# Supplementary material for: Inverse vulcanisation of self-activating amine and alkyne crosslinkers
Source: Royal Society of Chemistry journal article supplement (doi:10.1039/d3py00757j), 2023-01-01
Supplement: d3py00757j1.pdf [file d3py00757j1.pdf]

## Supporting Information

### Inverse Vulcanisation of Self-Activating Amine and Alkyne Crosslinkers

Liam Dodd, William Sandy, Romy Dop, Bowen Zhang, Amy Lunt, Daniel R. Neill, Tom Hasell

Department of Chemistry, University of Liverpool, Crown St, Liverpool, L69 7ZD, United Kingdom

#### Table of Contents

|                                                    |     |
|----------------------------------------------------|-----|
| I. General Considerations                          | S2  |
| II. Reaction Methods                               | S3  |
| III. Proposed Mechanism of Nucleophilic Initiation | S5  |
| IV. Representative TGA Data                        | S6  |
| V. Representative DSC Thermograms                  | S7  |
| VI. FTIR Spectra                                   | S8  |
| VII. Computationally Predicted IR Data             | S13 |
| VIII. CHNS and XRF                                 | S15 |
| IX. NMR of the Degradation Products                | S17 |
| X. Antimicrobial Activity Methods                  | S32 |
| XI. NMR Kinetics                                   | S33 |

## I. General Considerations

All chemicals were used as received. All Chemicals were obtained from Sigma Aldrich unless otherwise specified. Ground sulfur sublimed powder reagent grade  $\geq 99.5\%$  was obtained from Brenntag UK & Ireland. Triallylphosphine 97+% and triallylphosphite were obtained from thermo scientific. Triallylphosphate >96%, Dicyclopentadiene (stabilised with BHT) [precursor to Cyclopentadiene] >97%, and 1,3-Diisopropenylbenzene (stabilised with TBC) >97% were obtained from Tokyo Chemicals Industry. Prop-2-yn-1-amine 98% was obtained from Manchester organics. CHNS combustion microanalyses were performed on an elemental Vario Micro cube, with a first analysis performed to acquire rough data that was then used to calibrate the instrument for a second, more accurate analysis. Differential scanning calorimetry was performed on a TA instruments DSC25 discovery series equipped with an RCS90 and using Tzero aluminium hermetic pans and aluminium lids, in the heating range  $-90\text{ }^{\circ}\text{C}$  to  $150\text{ }^{\circ}\text{C}$ , at a heating rate of  $15\text{ }^{\circ}\text{Cmin}^{-1}$  and a cooling rate of  $7.5\text{ }^{\circ}\text{Cmin}^{-1}$ . PXRD data were collected in transmission mode on a Panalytical X'Pert PRO MPD equipped with a high throughput screening (HTS) XYZ stage, X-ray focusing mirror and PIXcel detector, using Cu K $\alpha$  radiation. Data were measured on loose powder samples held on thin Mylar film in stainless steel well plates, over the range  $4$  to  $40\text{ }^{\circ}$  in approximately  $0.013\text{ }^{\circ}$  steps over 60 minutes. All calculations were performed using the Gaussian 09 code. The following method has previously been found to be effective for the prediction of vibrational spectra, and so was used here: an initial energy minimisation using MMFF molecular mechanics was performed before geometry optimisation and energy calculation using the BP86 functional with the Def2-TZVPP basis set, applying a D3(BJ) empirical dispersion correction. FT-IR spectra were obtained on a Bruker vertex 70 diamond ATR. All TGA data was obtained on a TA instruments TGA550, operating under nitrogen with a ramp rate of  $20\text{ }^{\circ}\text{Cmin}^{-1}$  using platinum pans equipped with disposable aluminium cups. For the battery testing, samples were held isothermal at  $350\text{ }^{\circ}\text{C}$  for 1 hour.

## II. Reaction Methods

### II.A. Standard Dispersion Polymerisation

Mass X of sulfur was added to 50 cm<sup>3</sup> of xylene, which was then heated to reflux with 200 rpm stirring from a 14 mm cross shaped stirrer. Mass Y of a chosen crosslinker was then added to the reaction, where mass X plus mass Y always equalled 10 g in every reaction. The stirring was then increased to 1400 rpm, and the reaction was left at reflux overnight. This afforded two products: an insoluble fraction of polymer, and a soluble fraction of polymer. The two were separated by filtration, and the insoluble fraction, which often remained stuck to the sides of the reaction vessel, was removed by embrittlement via direct addition of liquid nitrogen and scraping with a spatula. The soluble fraction of polymer was evaporated to dryness, and then cured overnight in an oven at 140 °C to give what was termed, the sol product, of which it is important to note, may no longer be soluble in xylene and other solvents due to reacting and crosslinking further upon curing. The insoluble fraction of the reaction was purified by Soxhlet extraction on toluene overnight, after which it was cured in an oven at 140 °C to give what was termed, the insol product. The products of these reactions will be referred to by the following naming convention: NAME $\alpha$ -S $\beta$ -X, where NAME is the abbreviation of the crosslinker in use,  $\alpha$  is the feed ratio of that crosslinker in the reaction,  $\beta$  is the feed ratio of sulfur in that reaction, and X is replaced with either sol, to refer to the sol product, or insol, to refer to the insol product. Polymers were stored in the freezer at -20 °C, as Dale et al. has shown that the aging of inverse vulcanised polymers can be delayed by cold storage.

The above optimised method was reached after several iterations where several variables were modified. It was found that reaction volumes of 25, 50, and 100 mL of xylene had negligible effect on the reactions, and so 50 mL was chosen as the best compromise between convenient extraction and efficient use of solvent. With a 50 mL reaction volume, the presence of sodium dodecyl sulfate as a surfactant was tested, in weights of 0.01, 0.1, and 1 gram in a reaction, which was found to have negligible effect on the reaction.

### II.B. Dispersion Polymerisations of Low Boiling Point Crosslinkers

The method for polymerising MPA and DAA had to be modified, as these crosslinkers boil at below the melting temperature of sulfur (83 °C for MPA and 111 °C for DAA). To account for this, MPA and DAA were reacted as described in Section II.A., but at the initial temperatures of 70 °C and 100 °C, respectively. After 24 hours, a pre-polymer had formed. Attempting to cure this pre-polymer in the oven as detailed in Section II.A. an auto-acceleration resulted. As such, the reaction was continued in a dispersion polymerisation method, but after the initial 24 hours at 70 °C or 100 °C, the temperature was then increased to reflux, and left to react overnight. Other than this modification, the method remained the same as in Section II.A..

### II.C. Dispersion Polymerisation of Phosphorus Compounds

The method for polymerising the phosphorus containing crosslinkers, TAPIN, TAPIT, and TAPAT was the same as the method in section II.A. with the exception that these reactions needed longer to go to completion. Thus, once the crosslinker had been added to the reaction mixture, the reaction was left for one week rather than one day. The Sol and Insol products were also left to cure for two days to ensure the curing process was complete.

## II.D. Bulk Polymerisation Method for Crosslinker Blends

All reactions were performed in triplicate upon a hotplate equipped with an aluminium heating pan and an aluminium heating block, which ensured consistent positioning of the reaction vials upon the hotplate, giving consistent stirring. To a 40 mL reaction vial, a 14 mm cross-shaped stirrer was added. The mass was then recorded. A desired amount of elemental sulfur (5.0000 g for a reaction with DCPD, and 3.0000 g for a reaction with linseed oil), weighed out to within 0.0050 g of the target mass, was then added to the reaction vial. The reaction vial was heated to 135 °C, such that the sulfur melted. At least ten minutes for thermal equilibration was then allowed, with 200 rpm stirring during. Then, approximately 17 g of DCPD or 23 g of linseed oil (the exact masses were recorded) were added to a vial. Note that 17 g of DCPD was sufficient for three reactions each containing 5 g of DCPD, and that 23 g of linseed oil was sufficient for three reactions each containing 7 g of linseed oil. Using the exact mass of crosslinker recorded, the appropriate mass of either TAA or TPA was added to the crosslinker and thoroughly mixed to make a stock solution that would constitute the appropriate concentration of TAA or TPA to give the following mass percentages when added to the molten sulfur: 49 % DCPD and 1 % TAA or TPA, 47 % DCPD and 3 % TAA or TPA, 69 % linseed oil and 1 % TAA or TPA, 67 % linseed oil and 3 % TAA or TPA. For a DCPD reaction 5.0000 g  $\pm$  0.0050 g of the chosen stock solution was added to a new vial. This vial was then tared, and its contents added to the molten sulfur in the reaction vial, then re-weighing the empty vial to find the exact amount of stock solution added to the reaction by means of weighing by difference. For a linseed oil reaction 7.0000 g  $\pm$  0.0050 g of the chosen stock solution was added to a new vial. This vial was then tared, and its contents added to the molten sulfur in the reaction vial, then re-weighing the empty vial to find the exact amount of stock solution added to the reaction by means of weighing by difference. Once the stock solutions were added to the reaction vials, the reaction vials were immediately sealed with a septum with an affixed air balloon, and the stirring was increased to 800 rpm (any faster resulted in flicking of droplets the reaction mixture to the top of the vial). The time of the addition of the stock solution was noted. The air balloon was for pressure regulation, but also prevented volatilised crosslinker from escaping, thereby minimising crosslinker evaporation as volatilised crosslinker was unable to escape. The reactions were monitored closely, and the time at which the reaction mixture became so viscous that the stirrer could no longer rotate was noted. The time elapsed between addition of the stock solution and the ceasing of stirring was noted as the vitrification time. The reaction vials were then left on the hotplate at 135 °C for two days to cure. The septum and balloon were then removed, and the reaction vial was re-weighed to determine the yield, after which the glass vial was cooled with liquid nitrogen to detach the polymer from the vial. The vial was then shattered to retrieve the polymer. The polymer was then shattered to retrieve the stirrer.

### III. Proposed Mechanism for Nucleophilic Initiation

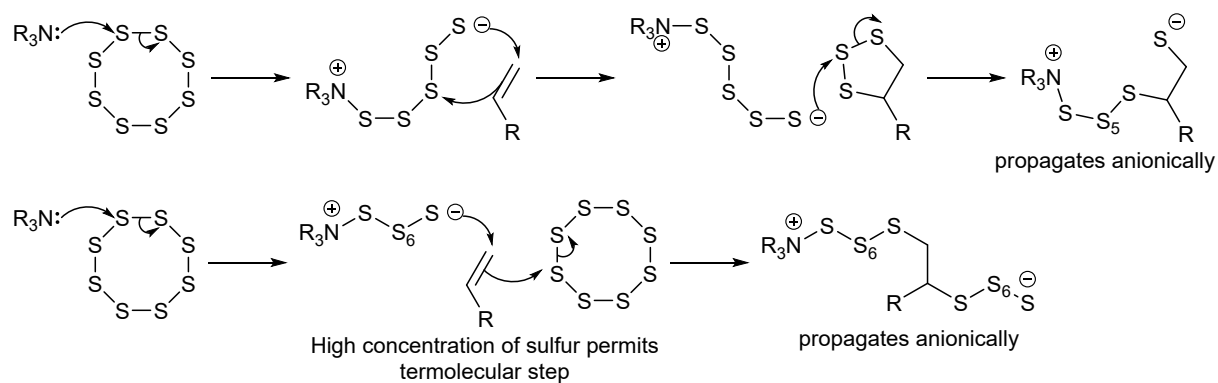

Figure S1: Proposed mechanism for anionic initiation of an inverse vulcanisation reaction by nucleophilic activation via amine activator.

#### IV. Representative TGA Data

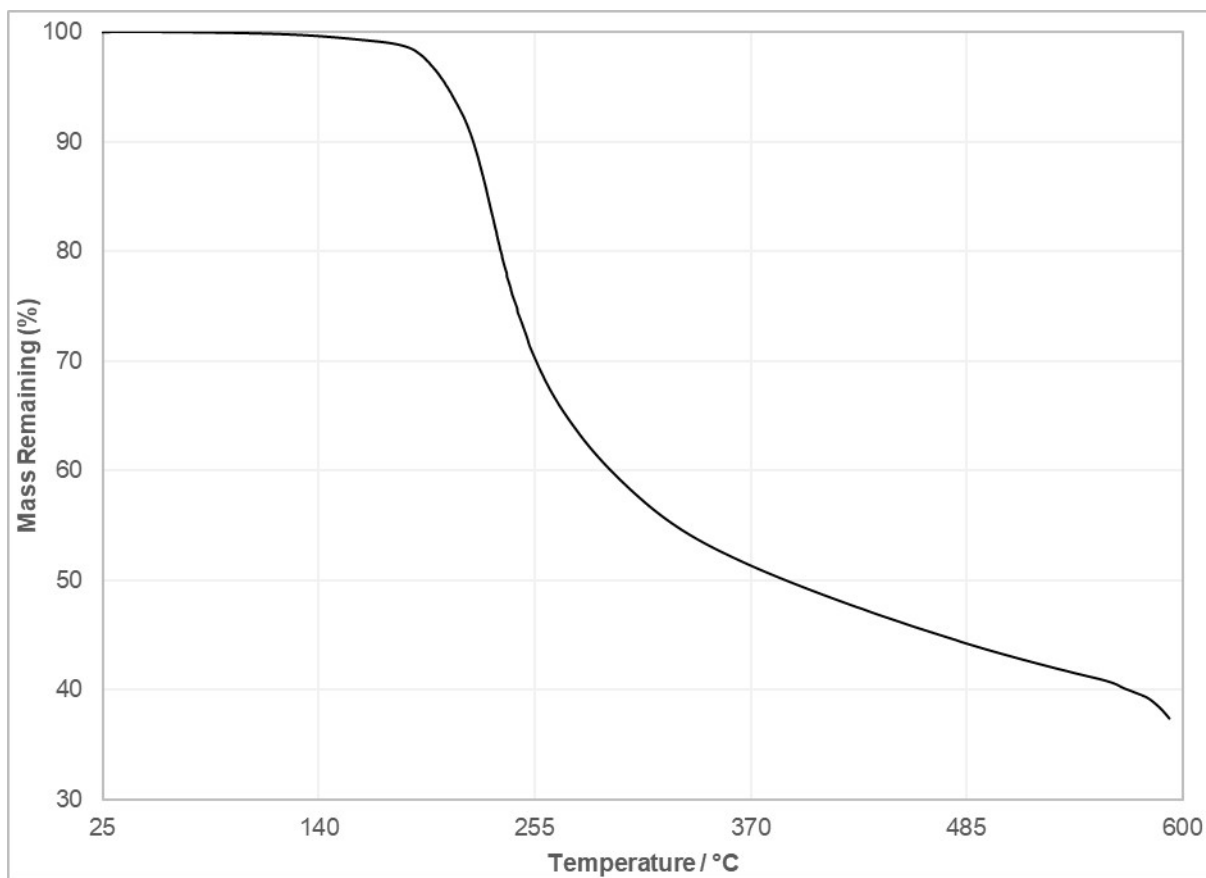

Figure S2: The TGA trace of TAA50-S50-Insol.

Table S1: Decomposition temperatures obtained from TGA for certain polymers

| Polymer   | Insol $T_d$ / °C | Sol $T_d$ / °C |
|-----------|------------------|----------------|
| TPA70-S30 | 209.8            | 227            |
| TPA50-S50 | 210.3            | 196.2          |
| TPA30-S70 | 214.9            | 211.4          |
| TPA10-S90 | 213.9            | 221            |
| TPA5-S95  | 209.6            | 223.4          |
| TAA70-S30 | 206.7            | 218.8          |
| TAA50-S50 | 198.5            | 214.3          |
| TAA30-S70 | 194.2            | 215.3          |
| TAA10-S90 | 194.3            | 215.6          |
| TAA5-S95  | 210.2            | 222.1          |
| NON70-S30 | 217.5            | 209.8          |
| NON50-S50 | 218.3            | 204.9          |
| NON30-S70 | 213.4            | 212.2          |
| NON10-S90 | 217              | 220            |
| NON5-S95  | 219.8            | 224.4          |

## V. Representative DSC Thermograms

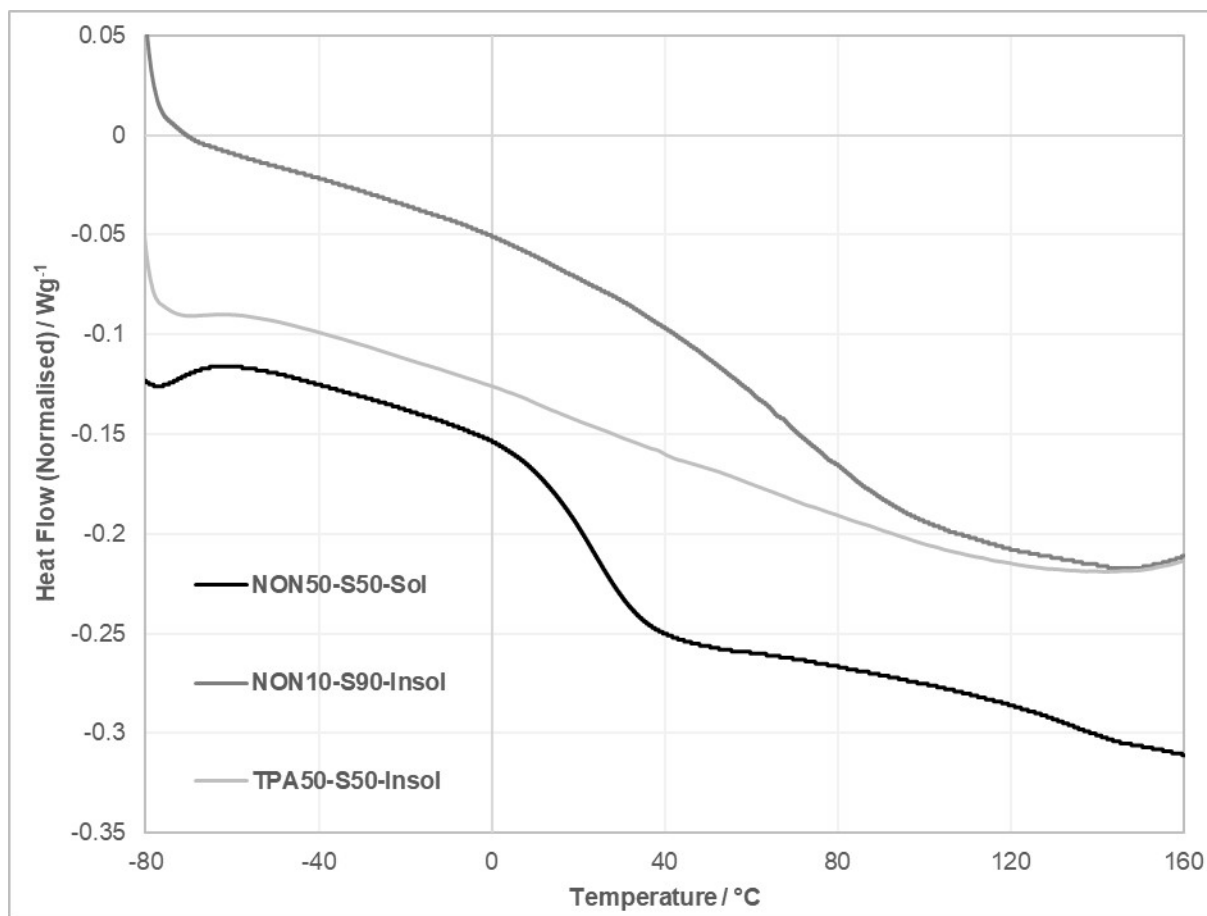

Figure S3: DSC thermograms of the second heating cycles for NON50-S50-Sol, NON10-S90-Insol, and TPA50-S50-Insol, showing a well-defined glass transition, a drawn-out glass transition, and no glass transition, respectively.

## VI. FTIR Spectra

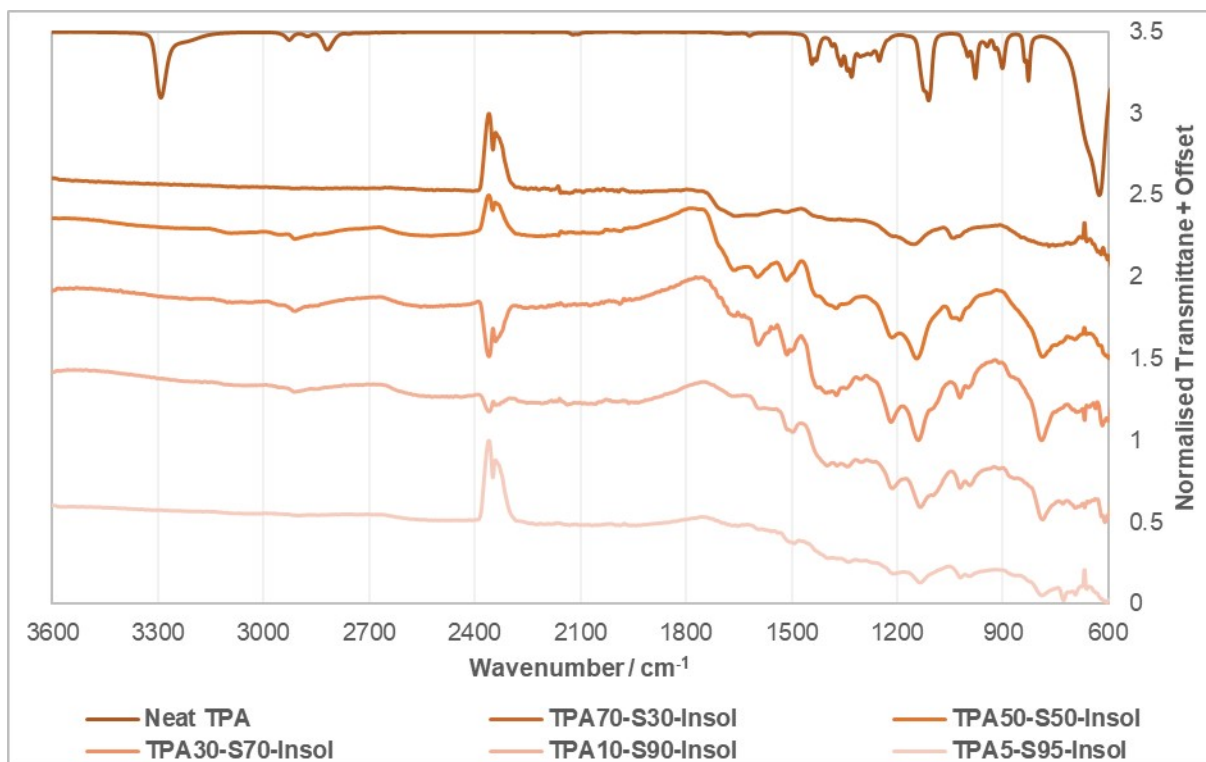

Figure S4: FTIR spectra for Insol polymers of TPA

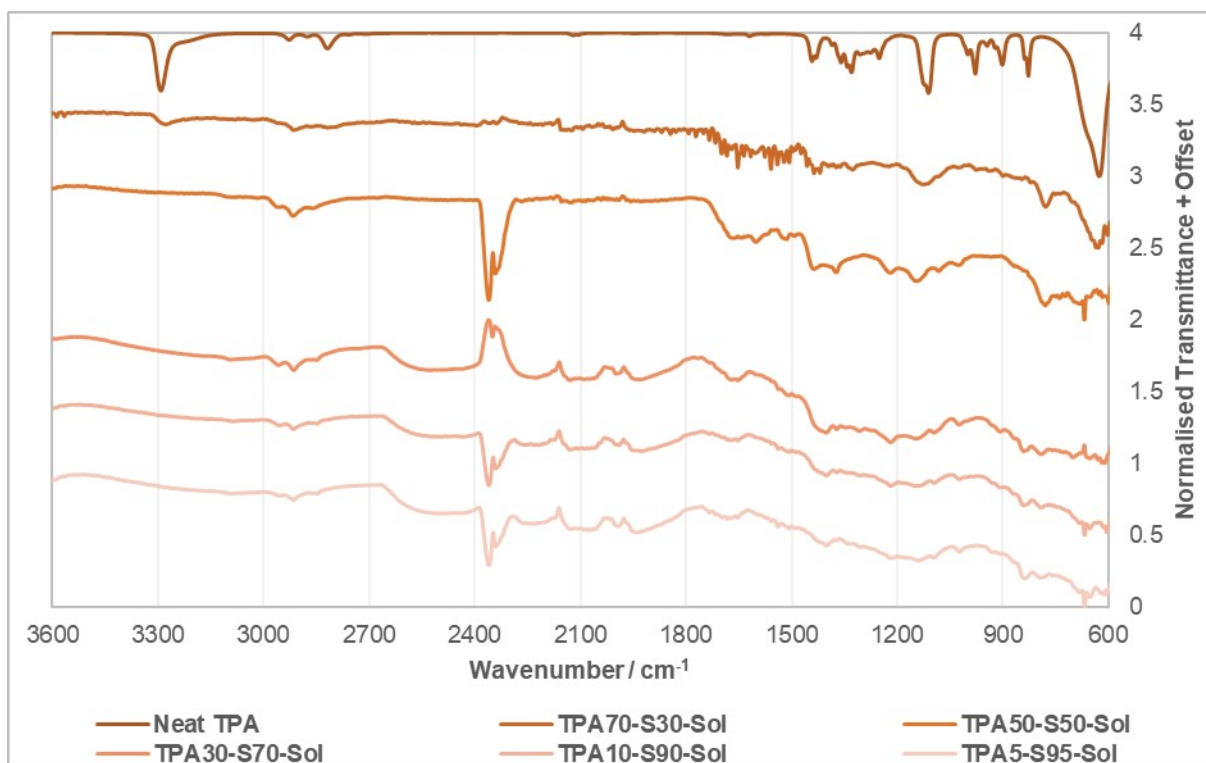

Figure S5: FTIR Spectra for Sol polymers of TPA



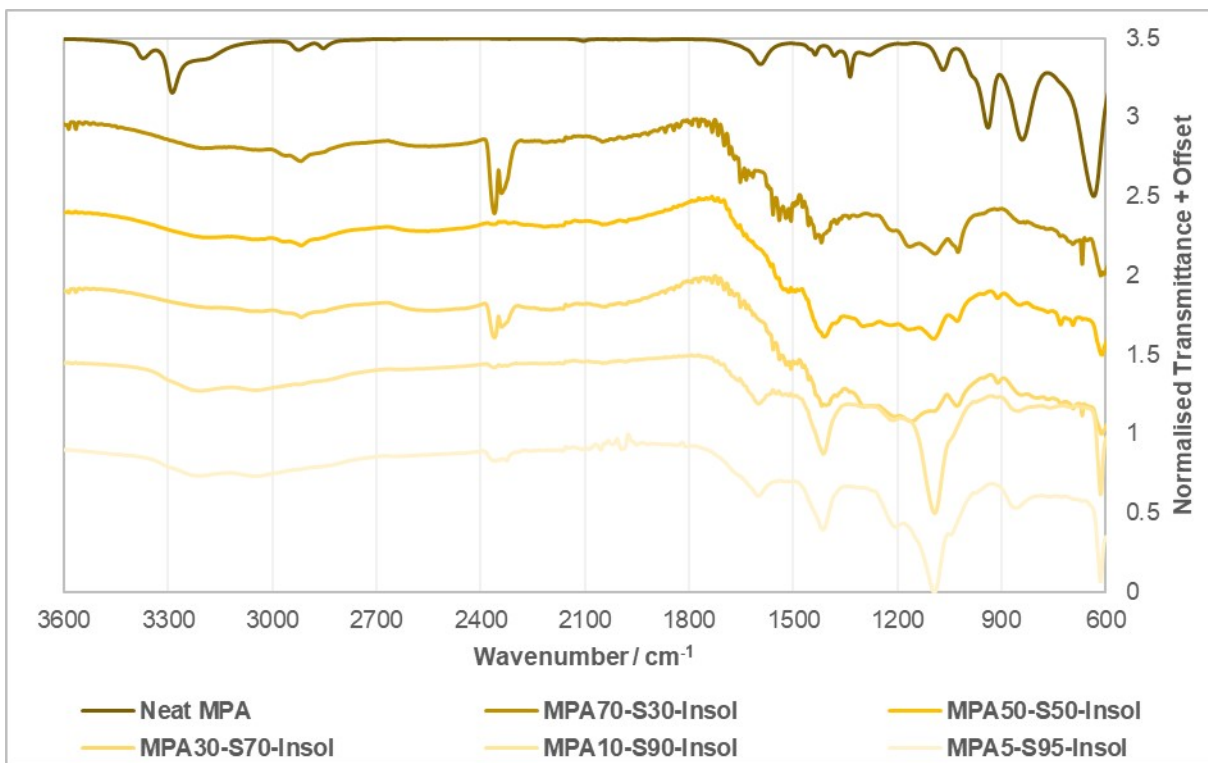

Figure S6: FTIR Spectra for Insol polymers of MPA

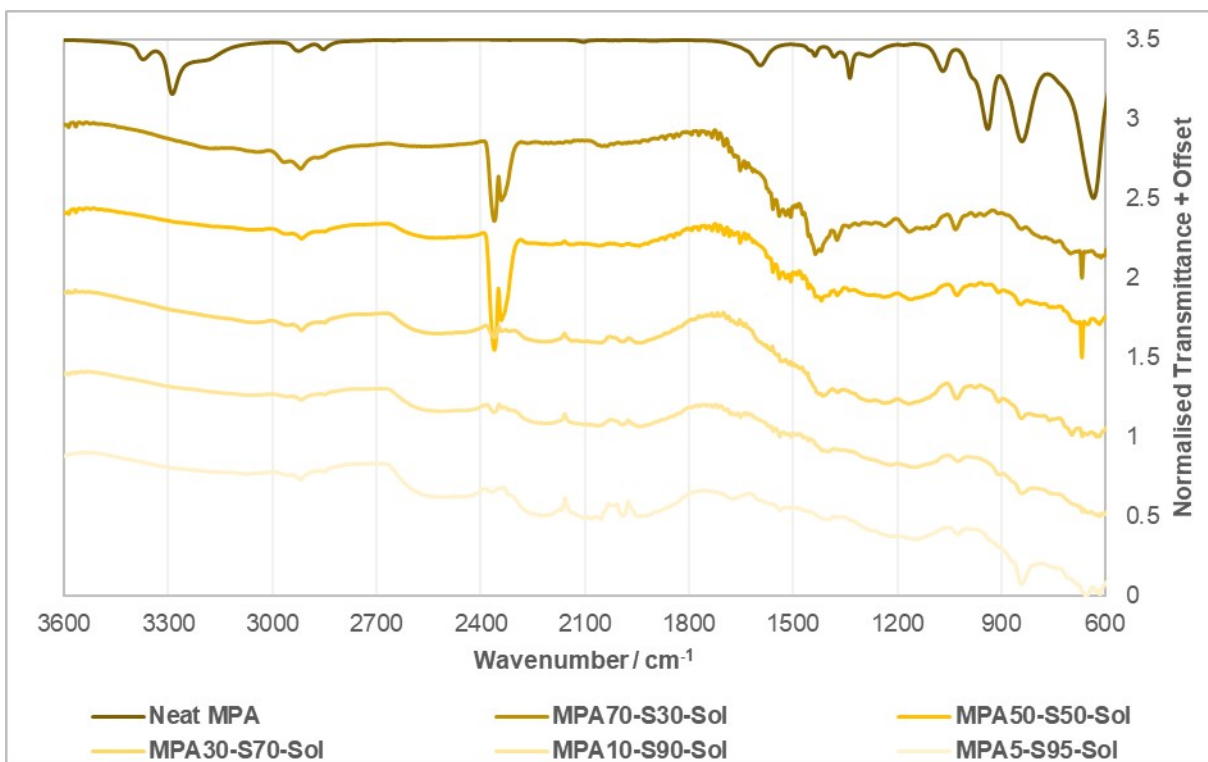

Figure S7: FTIR Spectra for Sol polymers of MPA

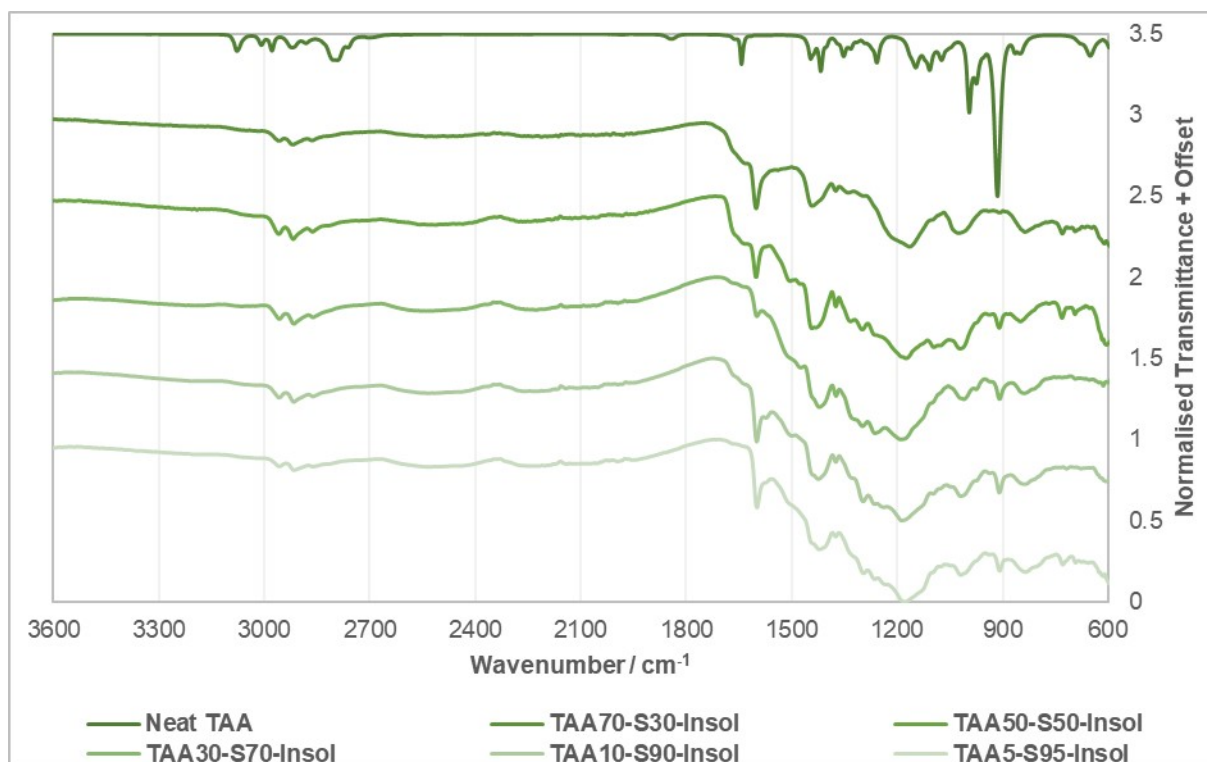

Figure S8: FTIR Spectra for Insol polymers of TAA

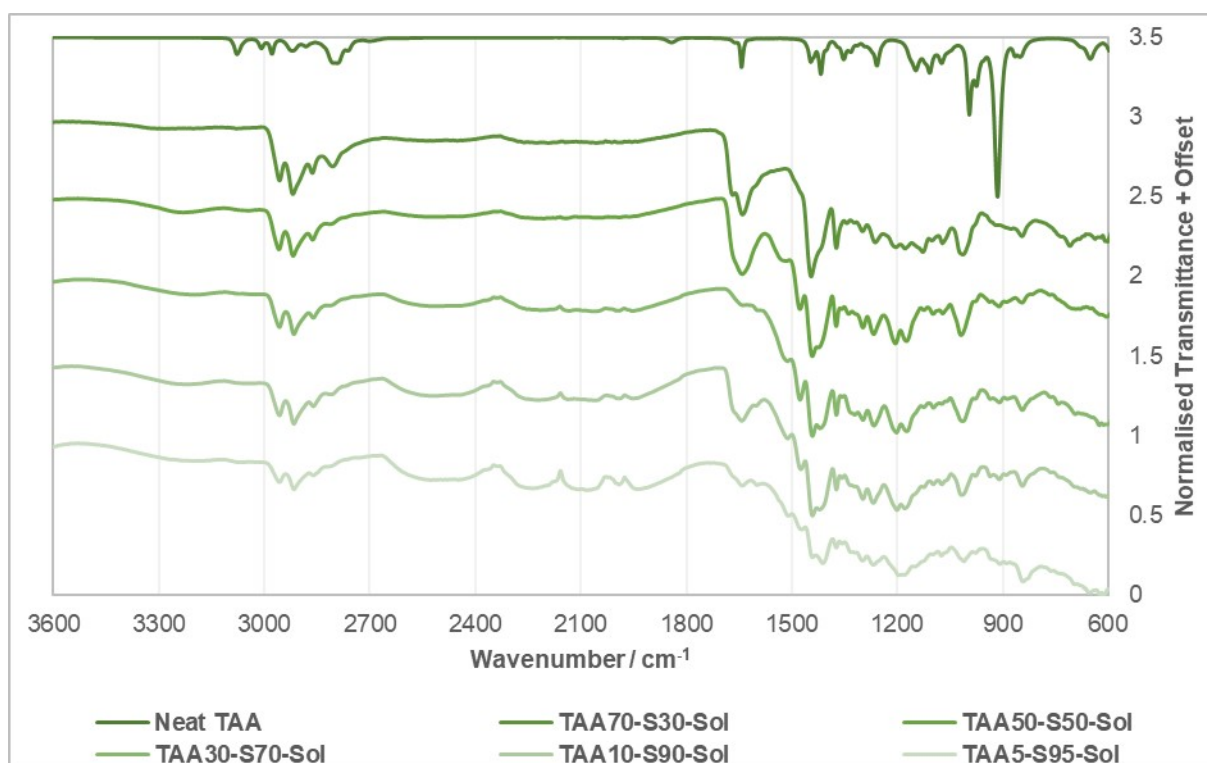

Figure S9: FTIR Spectra for Sol polymers of TAA

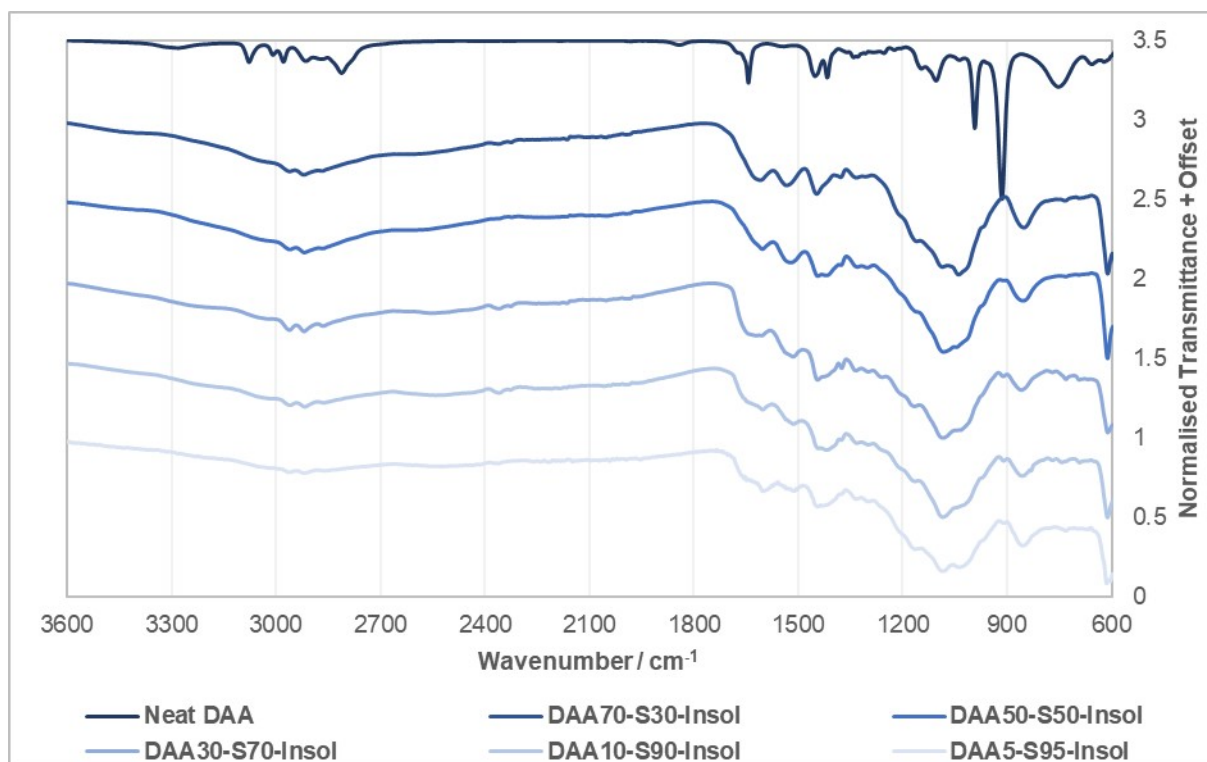

Figure S10: FTIR Spectra for Insol polymers of DAA

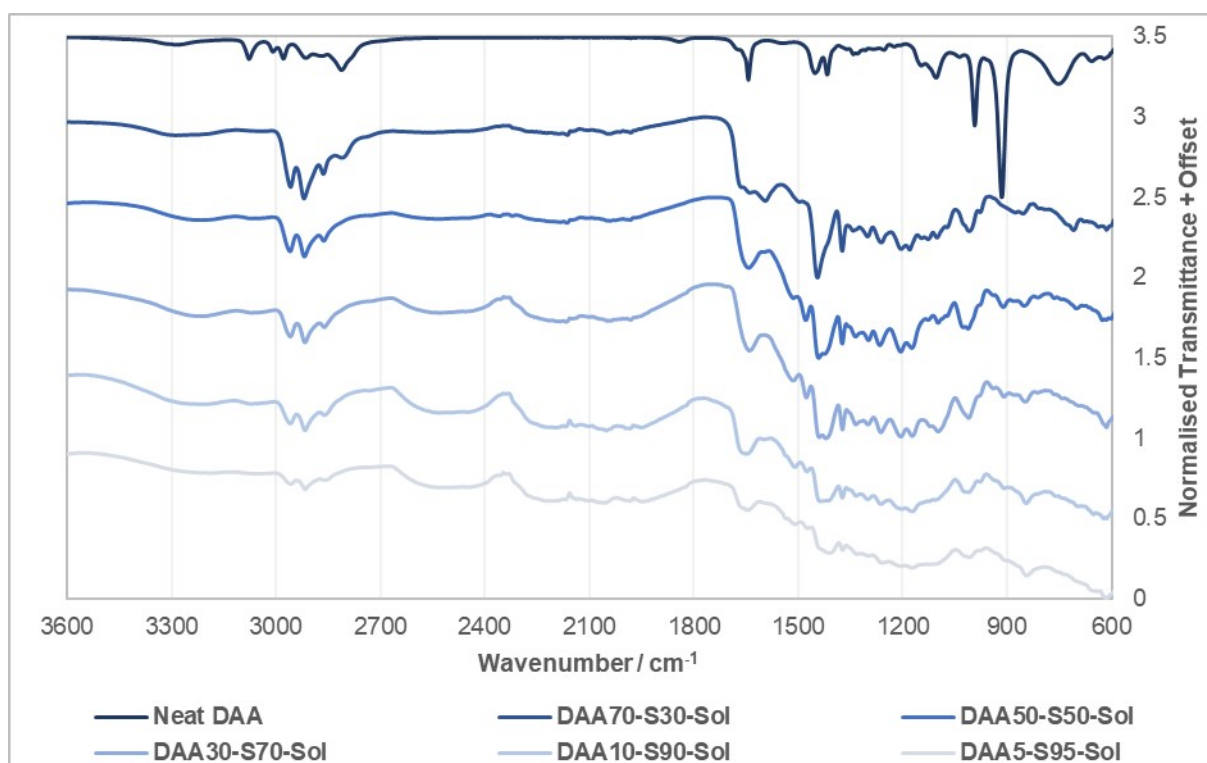

Figure S11: FTIR Spectra for Sol polymers of DAA

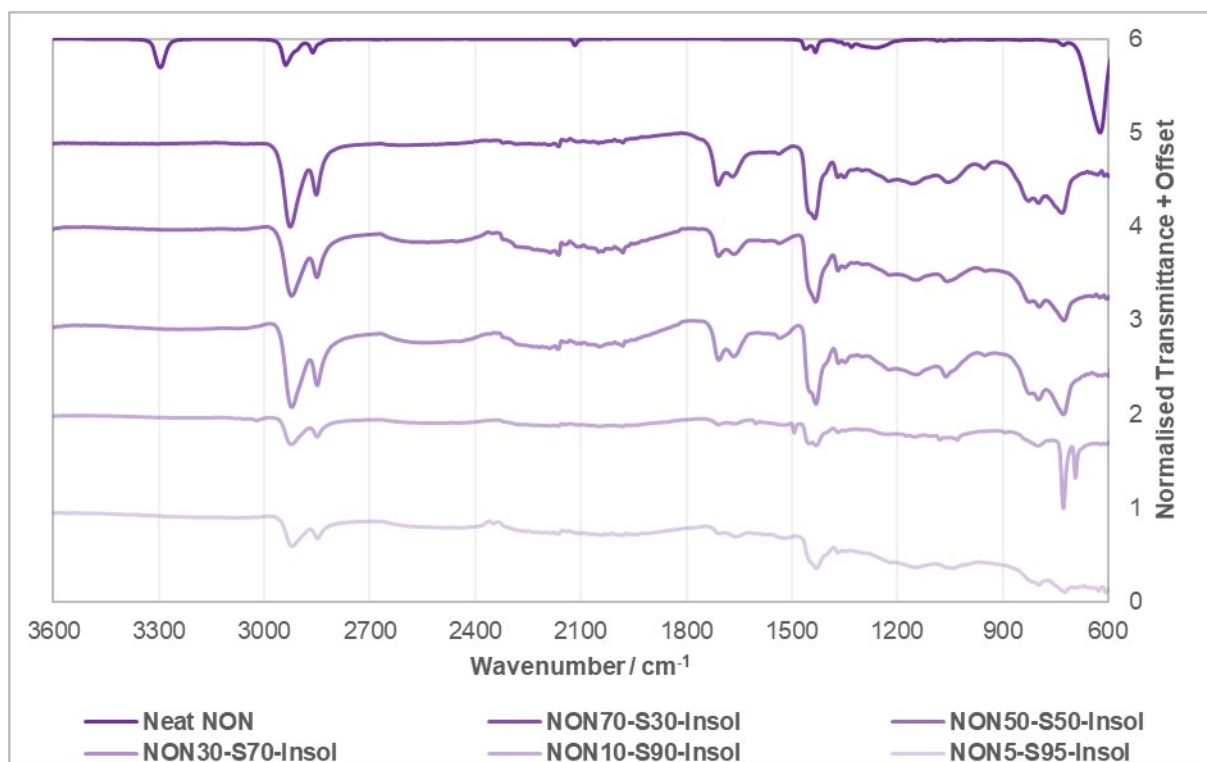

Figure S12: FTIR Spectra for Insol polymers of NON

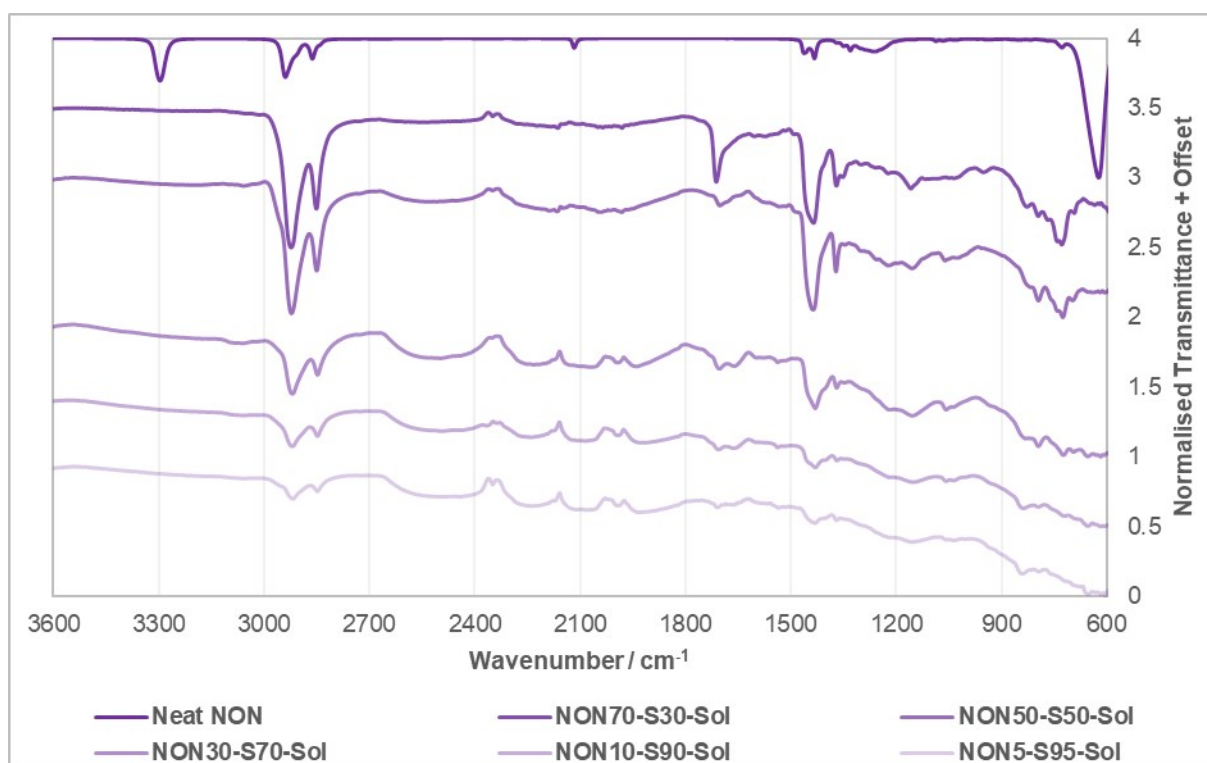

Figure S13: FTIR Spectra for Sol polymers of NON

## VII. Computationally Predicted IR Data

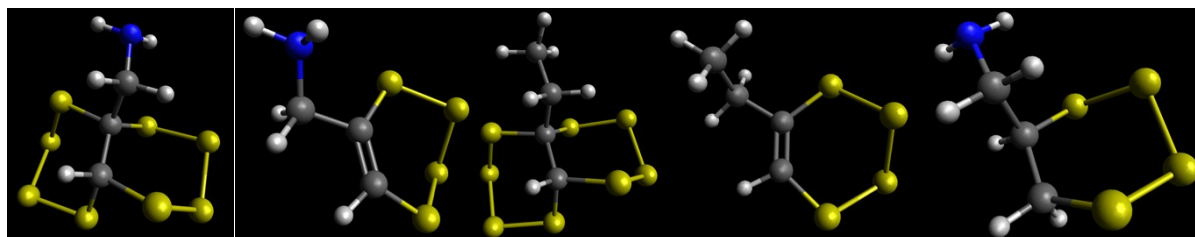

Figure S14: Geometry optimised structures for the models of the polymers. From left to right the identities are MPAfullreact (used in comparison to TPA and MPA polymers), MPApartreact (used in comparison to TPA and MPA polymers), NONfullreact (used in comparison to NON polymers), NONpartreact (used in comparison to NON polymers), TAAfullreact (used in comparison to TAA and DAA polymers). White atoms are hydrogen, grey atoms are carbon, yellow atoms are sulfur, and blue atoms are nitrogen.

Table S2: Calculated IR data for the models of the polymers, with particular modes of interest in bold

| Model        | Wavenumber / $\text{cm}^{-1}$      | Assignment                                                        |
|--------------|------------------------------------|-------------------------------------------------------------------|
| MPAfullreact | 653.659                            | <b>1,2 - C-S asymmetric stretch, with skeletal vibrations</b>     |
|              | 692.846                            | <b>1,1 - C-S asymmetric stretch, with skeletal vibrations</b>     |
|              | 718.928                            | <b>1,1 - C-S symmetric stretch, with skeletal vibrations</b>      |
|              | 806.712                            | NH <sub>2</sub> vibration                                         |
|              | 884.233                            | Carbon skeleton vibration with C-S asymmetric stretch             |
|              | 936.638                            | C-C-C asymmetric stretch                                          |
|              | 971.676                            | N-C-C-C asymmetric stretch                                        |
|              | 1072.88                            | S <sub>2</sub> C-H wag                                            |
|              | 1100.89                            | N-C stretch                                                       |
|              | 1146.45                            | C-H and N-H wags                                                  |
|              | 1194.03                            | C-H and N-H wags                                                  |
|              | 1313.59                            | CH <sub>2</sub> wag                                               |
|              | 1348.31                            | NH <sub>2</sub> -CH <sub>2</sub> symmetric wag                    |
|              | 1417.62                            | CH <sub>2</sub> scissor                                           |
|              | 1611.02                            | NH <sub>2</sub> scissor                                           |
|              | 2966.67                            | CH <sub>2</sub> and C-H asymmetric stretch                        |
|              | 2972.10                            | CH <sub>2</sub> and C-H symmetric stretch                         |
| 3025.85      | CH <sub>2</sub> asymmetric stretch |                                                                   |
| 3399.34      | NH <sub>2</sub> symmetric stretch  |                                                                   |
| 3482.25      | NH <sub>2</sub> asymmetric stretch |                                                                   |
| MPApartreact | 615.327                            | C-S stretch                                                       |
|              | 734.513                            | C-H, CH <sub>2</sub> , NH <sub>2</sub> wags and rocks             |
|              | 779.500                            | NH <sub>2</sub> vibration                                         |
|              | 806.274                            | S-C=C-S asymmetric vibration                                      |
|              | 913.527                            | C-C stretch with CH <sub>2</sub> , NH <sub>2</sub> wags and rocks |
|              | 1026.36                            | C-N stretch                                                       |
|              | 1085.66                            | N-C-C asymmetric stretch                                          |
|              | 1133.15                            | Skeletal vibration                                                |
|              | 1235.64                            | C-H wag                                                           |
|              | 1280.10                            | C-H wag                                                           |
|              | 1353.66                            | CH <sub>2</sub> rock                                              |
|              | 1441.48                            | CH <sub>2</sub> scissor                                           |
|              | 1530.68                            | C=C stretch                                                       |
|              | 1599.81                            | NH <sub>2</sub> scissor                                           |
|              | 2878.99                            | CH <sub>2</sub> asymmetric stretch                                |
|              | 2957.03                            | CH <sub>2</sub> asymmetric stretch                                |
|              | 3047.98                            | C-H stretch                                                       |
| 3414.73      | NH <sub>2</sub> symmetric stretch  |                                                                   |
| 3505.29      | NH <sub>2</sub> asymmetric stretch |                                                                   |
| NONfullreact | 643.226                            | <b>1,2 - C-S asymmetric stretch, with skeletal vibrations</b>     |
|              | 685.627                            | <b>1,1 - C-S asymmetric stretch, with skeletal vibrations</b>     |

|              |                                                                                                                                                                                                                                                                      |                                                                                                                                                                                                                                                                                                                                                                                                                                                                                                                                                                                                                                                                                                                                                                                                                                                                   |
|--------------|----------------------------------------------------------------------------------------------------------------------------------------------------------------------------------------------------------------------------------------------------------------------|-------------------------------------------------------------------------------------------------------------------------------------------------------------------------------------------------------------------------------------------------------------------------------------------------------------------------------------------------------------------------------------------------------------------------------------------------------------------------------------------------------------------------------------------------------------------------------------------------------------------------------------------------------------------------------------------------------------------------------------------------------------------------------------------------------------------------------------------------------------------|
|              | 724.624<br>794.024<br>892.147<br>953.569<br>1032.35<br>1065.63<br>1074.46<br>1082.87<br>1183.42<br>1266.29<br>1308.42<br>1363.66<br>1419.88<br>1443.19<br>1452.41<br>2953.30<br>2972.56<br>2976.19<br>3013.59<br>3044.29<br>3051.51                                  | C-S stretch with skeletal vibrations<br>Carbon skeleton wag<br>Carbon skeleton breathing<br>C-C-C asymmetric stretch<br>CH <sub>3</sub> -CH <sub>2</sub> -CS <sub>2</sub> - asymmetric stretch of carbon bonds<br>CH wag with CH <sub>3</sub> rocking<br>Carbon skeletal vibration<br>Carbon skeletal vibration<br>CH wag<br>CH <sub>2</sub> rock<br>CH <sub>2</sub> rock<br>CH <sub>3</sub> vibration<br>CH <sub>2</sub> scissor<br>CH <sub>3</sub> vibration<br>CH <sub>3</sub> scissor<br>CH <sub>2</sub> symmetric stretch<br>All CH bonds breathing<br>CH <sub>3</sub> breathing<br>CH vibrations<br>CH <sub>3</sub> asymmetric stretch<br>CH vibrations                                                                                                                                                                                                     |
| NONpartreact | 603.739<br>735.193<br>753.278<br>813.427<br>907.745<br>1025.29<br>1053.10<br>1090.41<br>1222.32<br>1270.10<br>1291.48<br>1358.33<br>1429.13<br>1444.29<br>1455.89<br>1543.23<br>2942.55<br>2966.23<br>2988.42<br>3037.72<br>3042.52<br>3053.32                       | C-S stretch<br>C-S stretch with carbon skeleton vibrations<br>Carbon skeleton rocking<br>S-C=C-S asymmetric stretch<br>C-C-C symmetric stretch with C-S stretch<br>C-C-C asymmetric stretch with C-S stretch<br>C=C stretch with carbon skeleton vibrations<br>C-C-C=C central bond stretch<br>C=C stretch with carbon skeleton vibrations<br>C-S stretch with carbon skeleton vibrations<br>CH <sub>2</sub> rock<br>CH <sub>3</sub> vibration<br>CH <sub>2</sub> scissor<br>CH <sub>3</sub> vibration<br>CH <sub>3</sub> scissor<br>C=C stretch<br>CH <sub>2</sub> symmetric stretch<br>CH <sub>3</sub> breathing<br>CH <sub>2</sub> asymmetric stretch<br>CH <sub>3</sub> asymmetric stretch<br>CH <sub>3</sub> asymmetric stretch<br>C=C-H stretch                                                                                                             |
| TAAfullreact | 655.125<br>791.242<br>839.355<br>871.885<br>956.764<br>1004.36<br>1075.13<br>1107.25<br>1163.14<br>1184.16<br>1240.40<br>1260.50<br>1325.13<br>1346.23<br>1381.29<br>1430.28<br>1612.34<br>2931.91<br>2949.52<br>2960.86<br>3012.98<br>3022.48<br>3388.41<br>3466.67 | C-S stretch<br>C-S stretch with carbon skeleton + NH <sub>2</sub> vibrations<br>Carbon skeleton rocking + NH <sub>2</sub> vibrations<br>Carbon skeleton rocking + NH <sub>2</sub> vibrations<br>S-C-C-S stretch<br>C-C-C asymmetric stretch<br>N-H stretch<br>Carbon skeleton stretches + NH <sub>2</sub> vibrations<br>Carbon skeleton stretches<br>C-H wags with C-S stretch<br>Carbon skeleton wag + NH <sub>2</sub> wag<br>C-H wags with C-S stretch<br>C-H and N-H wags<br>NH <sub>2</sub> -CH <sub>2</sub> symmetric wag<br>S-CH <sub>2</sub> scissoring<br>N-CH <sub>2</sub> scissoring<br>NH <sub>2</sub> scissoring<br>C-H vibrations<br>CH <sub>2</sub> symmetric stretches<br>C-H breathing<br>CH <sub>2</sub> asymmetric stretches<br>S-CH <sub>2</sub> asymmetric stretch<br>NH <sub>2</sub> symmetric stretch<br>NH <sub>2</sub> asymmetric stretch |

## VIII. CHNS and XRF

Table S3: Unreliable combustion microanalysis data for Sol and Insol products of TPA, TAA, and NON polymers

| Polymer Name    | Expected |      |      |       | Combustion Microanalyses |      |      |       |
|-----------------|----------|------|------|-------|--------------------------|------|------|-------|
|                 | %C       | %H   | %N   | %S    | %C                       | %H   | %N   | %S    |
| TPA70-S30-sol   | 57.69    | 4.84 | 7.48 | 30.00 | 62.55                    | 5.49 | 7.73 | 23.44 |
| TPA70-S30-insol |          |      |      |       | 46.30                    | 3.37 | 5.38 | 36.30 |
| TPA50-S50-sol   | 41.21    | 3.46 | 5.34 | 50.00 | 58.26                    | 5.19 | 6.95 | 28.90 |
| TPA50-S50-insol |          |      |      |       | 41.18                    | 2.85 | 4.93 | 45.16 |
| TPA30-S70-sol   | 24.72    | 2.08 | 3.20 | 70.00 | 15.28                    | 1.59 | 1.28 | 82.16 |
| TPA30-S70-insol |          |      |      |       | 37.53                    | 2.69 | 4.37 | 55.26 |
| TPA10-S90-sol   | 8.24     | 0.69 | 1.07 | 90.00 | 4.44                     | 0.80 | 0.00 | 97.30 |
| TPA10-S90-insol |          |      |      |       | 38.80                    | 2.16 | 4.35 | 53.42 |
| TPA05-S95-sol   | 4.12     | 0.35 | 0.53 | 95.00 | 3.97                     | 0.70 | 0.00 | 97.45 |
| TPA05-S95-insol |          |      |      |       | 39.27                    | 2.21 | 4.21 | 53.67 |
| TAA70-S30-sol   | 55.14    | 7.71 | 7.15 | 30.00 | 53.83                    | 6.76 | 6.41 | 32.01 |
| TAA70-S30-insol |          |      |      |       | 46.30                    | 3.37 | 5.38 | 36.30 |
| TAA50-S50-sol   | 39.39    | 5.51 | 5.11 | 50.00 | 45.78                    | 3.83 | 5.05 | 43.08 |
| TAA50-S50-insol |          |      |      |       | 41.18                    | 2.85 | 4.93 | 45.16 |
| TAA30-S70-sol   | 23.63    | 3.31 | 3.06 | 70.00 | 24.16                    | 2.80 | 2.75 | 69.77 |
| TAA30-S70-insol |          |      |      |       | 37.53                    | 2.69 | 4.37 | 55.26 |
| TAA10-S90-sol   | 7.88     | 1.10 | 1.02 | 90.00 | 11.29                    | 1.55 | 0.08 | 88.79 |
| TAA10-S90-insol |          |      |      |       | 38.80                    | 2.16 | 4.35 | 53.42 |
| TAA05-S95-sol   | 3.94     | 0.55 | 0.51 | 95.00 | 7.07                     | 1.24 | 0.38 | 93.91 |
| TAA05-S95-insol |          |      |      |       | 39.27                    | 2.21 | 4.21 | 53.67 |
| NON30-S70-sol   | 26.98    | 3.02 | 0.00 | 70.00 | 8.19                     | 1.34 | 0.00 | 94.02 |
| NON30-S70-insol |          |      |      |       | 39.43                    | 3.93 | 0.00 | 55.78 |
| NON10-S90-sol   | 8.99     | 1.01 | 0.00 | 90.00 | 3.27                     | 0.70 | 0.00 | 99.20 |
| NON10-S90-insol |          |      |      |       | 44.11                    | 4.45 | 0.00 | 50.49 |

For the following results, the polymers were synthesized via bulk polymerisation, as described in Section II.D. of the supporting information with a few modifications. Briefly, sulfur was melted and thermally equilibrated over ten minutes at 135 °C. then, DVB (weighed by difference) was added to the vial, which was then immediately sealed with a septum and air balloon, minimising crosslinker evaporation whilst allowing pressure regulation. The reactions were left overnight with 800 rpm stirring.

Table S4: Comparison of combustion microanalysis and XRF data for some standard DVB polymers

| Polymer     | Reactant masses / g                        | Yield               | Expected |      |       | Combustion Microanalyses |      |       | XRF   |
|-------------|--------------------------------------------|---------------------|----------|------|-------|--------------------------|------|-------|-------|
|             |                                            |                     | %C       | %H   | %S    | %C                       | %H   | %S    | %S    |
| DVB70-S30   | DVB: 6.9785 g<br>S <sub>g</sub> : 3.0062 g | 9.4947 g<br>95.08 % | 63.05    | 5.29 | 31.67 | 62.80                    | 5.37 | 31.39 | 34.82 |
| DVB50-S50-A | DVB: 4.9885 g<br>S <sub>g</sub> : 5.0064 g | 9.6995 g<br>97.05 % | 44.64    | 3.75 | 51.61 | 44.16                    | 3.75 | 51.81 | 62.42 |
| DVB50-S50-B | DVB: 4.9888 g<br>S <sub>g</sub> : 5.0058 g | 9.7355 g<br>97.40 % | 44.82    | 3.76 | 51.42 | 43.98                    | 3.74 | 51.82 | 60.62 |
| DVB30-S70   | DVB: 2.9944 g<br>S <sub>g</sub> : 7.0075 g | 9.8924 g<br>98.91 % | 26.91    | 2.26 | 70.83 | 25.96                    | 2.33 | 72.13 | 85.39 |

Expected CHNS values were calculated by assuming that all losses to the yield were the result of crosslinker evaporation. Table S4 shows that combustion microanalysis can be remarkably accurate when the polymerisation is carefully controlled, and the volatilisation of crosslinker is accounted for. The XRF over-estimates the quantity of sulfur, and it is found that this is because of the one hour exposure time used in these initial XRF experiments. Later experiments with very short exposure times underestimated the amount of sulfur, and the longer the exposure time was, the more the sulfur content was less underestimated and became more over estimated. This is presumed to be due to the carbon content being burned off by the X-rays. Great effort was made to find a method of XRF analysis that produced trustworthy results, but these efforts were ultimately fruitless. No suitable baseline could be created for the measurements which could've been due to a combination of matrix effects (which cannot easily be taken into account in the largely unstudied structures of inverse vulcanised polymers), and the lack of stability in the baseline between measurements. Numerous other issues were encountered, such as inconsistent and complex shaped calibration curves which could've been a result of changing sample density. For high density samples, the XRF response tends to come from a hemisphere of the sample under the irradiation point, but in higher density samples, the X-rays penetrate deeper in and give a response from deeper in the sample, resulting in a tear drop shaped response zone. Since sulfur polymers vary in density as their sulfur loading changes, it was believed that the response zone was changing shape from a hemi-sphere for high density samples, to a tear-drop at lower density samples, and that this could have resulted in a change in the signal response with sulfur loading, however attempts to take this into account were not successful in yielding sensible calibration curves, meaning that either this hypothesis is untrue, or there are more unaccounted for effects.



## IX. NMR of the Degradation Products

Firstly, approximately 100 mg of polymer was added to an oven dried 14 mL glass vial containing a PTFE stirrer, all of which was sealed with a septum and purged with nitrogen for a few minutes. Afterward 5 mL of 1 M LiAlH<sub>4</sub> in THF was injected into the vial, and the reaction was left stirring overnight with a nitrogen balloon affixed. The next day it was noted that there was still remaining solid in the reaction solution, indicating that the LiAlH<sub>4</sub> the reaction had not gone to completion in terms of degrading the polymer structure. The reaction solution was quenched by the dropwise addition of deionised water until addition of more water caused no further fizzing, at which point 1 M HCl in deionised water was added to make the reaction solution up to 10 mL. During the quench, vigorous fizzing was noted, indicating that there was plentiful LiAlH<sub>4</sub> remaining. The reaction mixture was transferred into a 20 mL vial, where in the aqueous phase was extracted three times with EtOAc. The EtOAc, usually clear yellow, clear orange, or clear brown in colour, was washed with brine and dried over MgSO<sub>4</sub>, before it was evaporated to dryness, leaving a solid residue. The residue was analysed by <sup>1</sup>H NMR, <sup>13</sup>C NMR, <sup>13</sup>C DEPT135 NMR, <sup>1</sup>H <sup>1</sup>H COSY NMR, and <sup>1</sup>H <sup>13</sup>C HSQC NMR. This process was performed on the Sol and Insol products of TPA50-S50, TAA50-S50, NON50-S50, MPPA50-S50, and DAA50-S50, though it is important to note that the EtOAc extracts from the TPA50-S50-Insol and NNON50-S50-Insol were clear and colourless, and yielded no residue when evaporated to dryness.

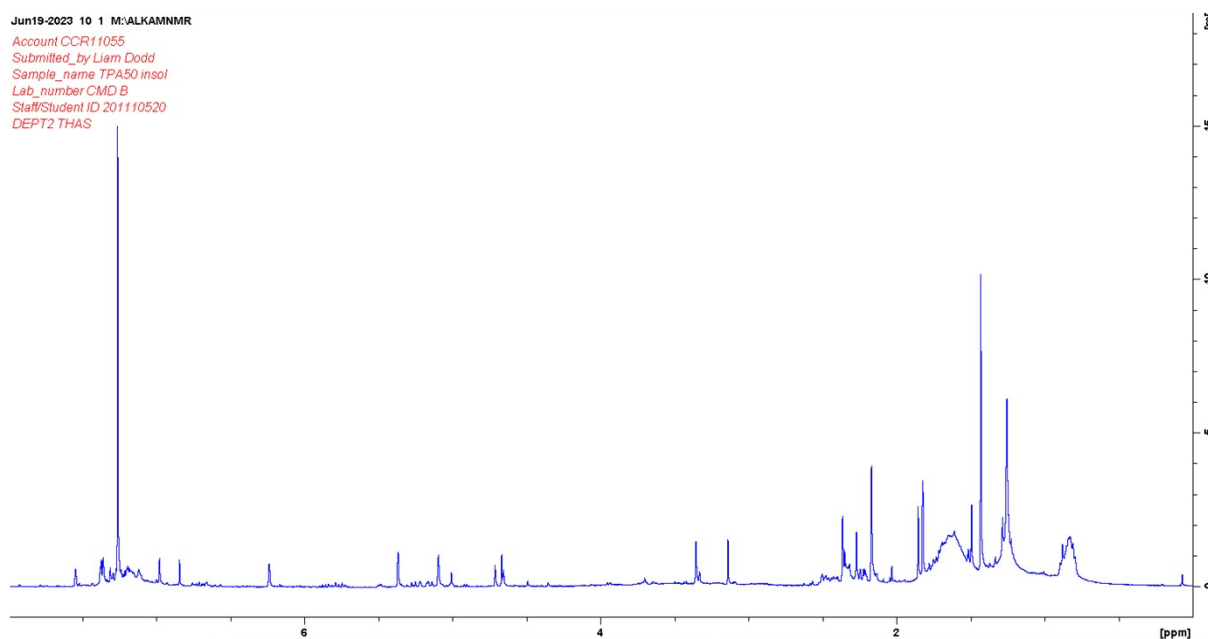

Figure S15: The <sup>1</sup>H NMR spectrum of the degradation products of TPA50-S50-Sol. Note that in the figure the title suggests the sample is that of an Insol. This is a mistake in the naming, but sample is indeed TPA50-S50-Sol.

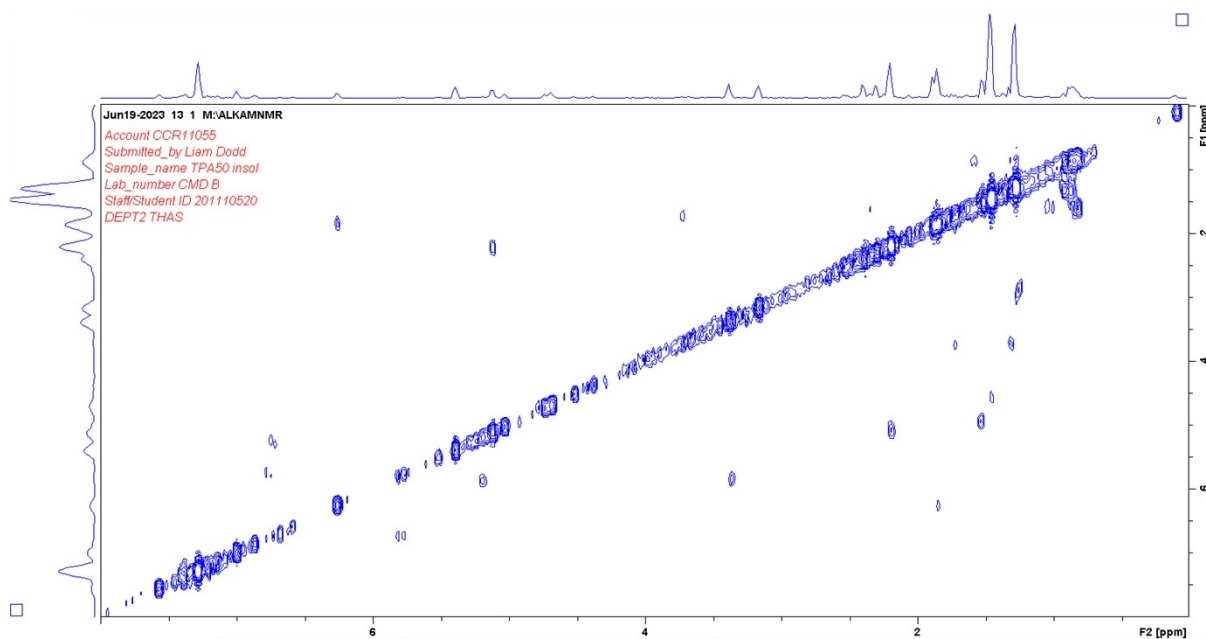

Figure S16: The  $^1\text{H}$   $^1\text{H}$  COSY NMR spectrum of the degradation products of TPA50-S50-Sol. Note that in the figure the title suggests the sample is that of an Insol. This is a mistake in the naming, but sample is indeed TPA50-S50-Sol.

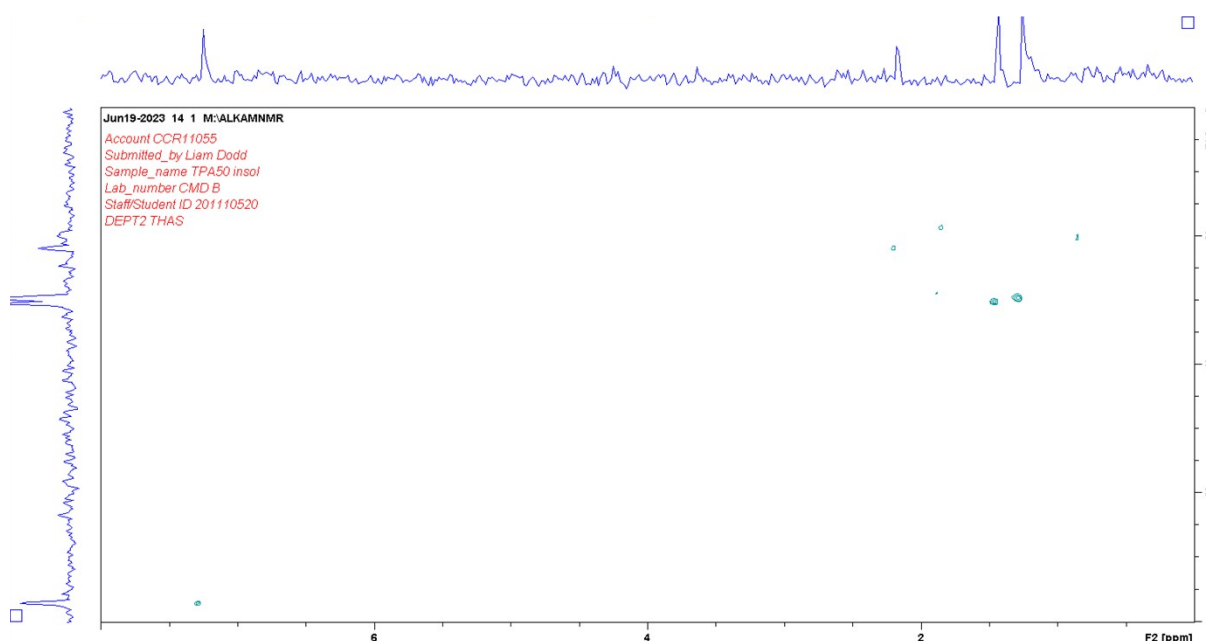

Figure S17: The  $^1\text{H}$   $^{13}\text{C}$  HSQC NMR spectrum of the degradation products of TPA50-S50-Sol. Note that in the figure the title suggests the sample is that of an Insol. This is a mistake in the naming, but sample is indeed TPA50-S50-Sol.

Figure S15 contains numerous broad peaks over wide chemical shift ranges, suggesting that the degradation products are oligomeric in nature, rather than clean cut monomer units. Figure S15 does however provide some insights. First of all, though they are of low integration, there appears to aromatic hydrogens between 7.5 ppm and 6.5 ppm. These have been attributed to thiophenes, as the

signals seem to be for the most part singlets, which would be explained by the formation of a thiophene structure. However, thiophene resonances would be expected below 7 ppm, so it also proposed that there is some formation of benzene rings and thiophenol rings, which would explain the dense multiplet above 7 ppm, as well as the peaks as high as 7.5 ppm. Figure S16 shows that the thiophene resonances are not coupled to the benzene resonances, supporting the conclusion that these resonances belong to separate types of fragment. Figure S16 also shows that there is coupling between the supposed thiophene resonance at 6.24 and the resonance at 1.85 which could be an alkyl fragment bound to the thiophene ring. The peak at 3.35 ppm is dubiously attributed to a thiophenol thiol, because it occurs in the expected range, but is not broad as would be expected. Importantly, these aromatic peaks are much weaker than the alkyl region, which may suggest that these aromatic fragments are by-products rather than the predominant species. Another minority by-product appears to be alkenes, as there are resonances in the region of 5.5 to 5 ppm, which is in agreement with the results of the FTIR spectroscopy that the alkynes may react to form alkenes first, before reacting onward. Below 2.5 ppm is where the majority of the signals are, but it is too complex to analyse in detail. There are several broad peaks in this range which could be attributed to the thiol hydrogens that would be expected of this degradation product. There seems to be numerous alkyl resonances scattered throughout the region, which Figure S16 shows are intercoupled in a complex manner, again suggesting an oligomeric structure for the degradation product. The  $^{13}\text{C}$  NMR and DEPT135  $^{13}\text{C}$  NMR failed to give any signals, despite being placed on a long NMR experiment to enhance their signal to noise ratios. Strangely, Figure S17 shows that the  $^1\text{H}$   $^{13}\text{C}$  HSQC NMR did manage to acquire  $^{13}\text{C}$  signals, but overall Figure S17 does not provide much diagnostic information. Figure S18 shows potential ways that thiophenes, benzenes and thiophenols could form.

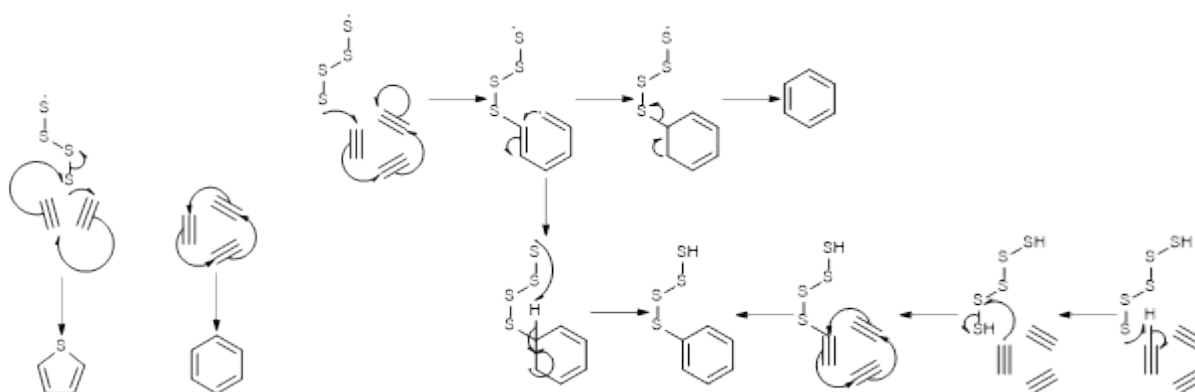

Figure S18: Potential mechanisms for the formation of the aromatic by-products. R groups have been omitted for clarity.

Jun19-2023 20 1 M:ALKAMNMR  
Account CCR11055  
Submitted\_by Liam Dodd  
Sample\_name TAA50 insol  
Lab\_number CMD B  
Staff/Student ID 201110520  
DEPT2 THAS

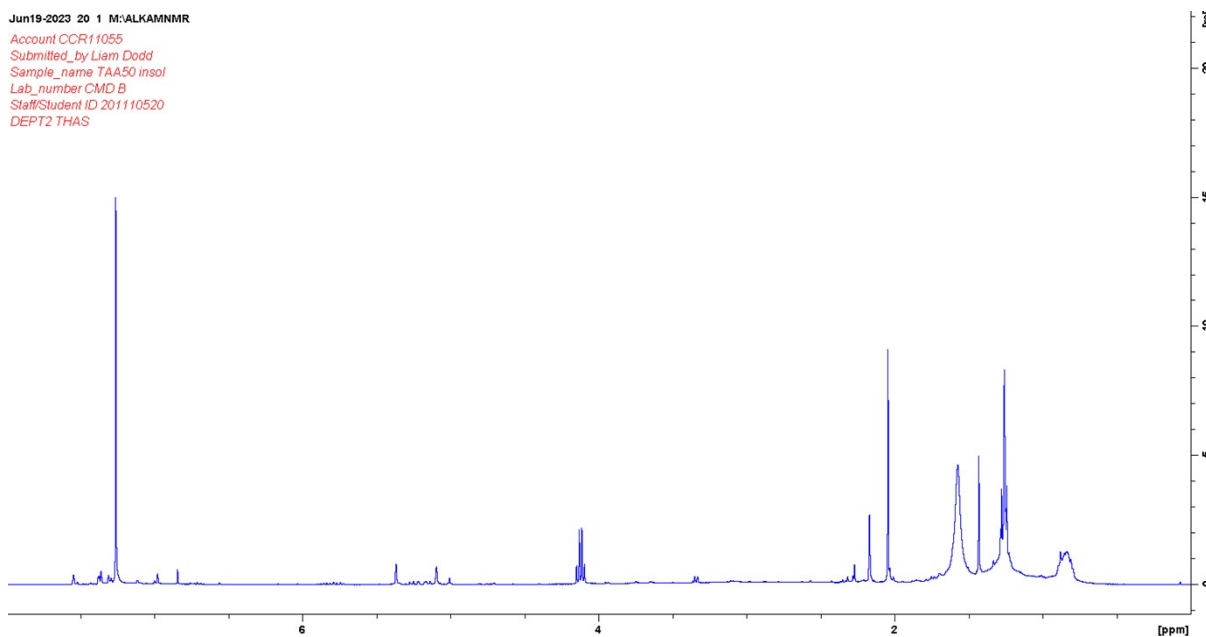

Figure S19: The  $^1\text{H}$  NMR spectrum of the degradation products of TAA50-S50-Insol.

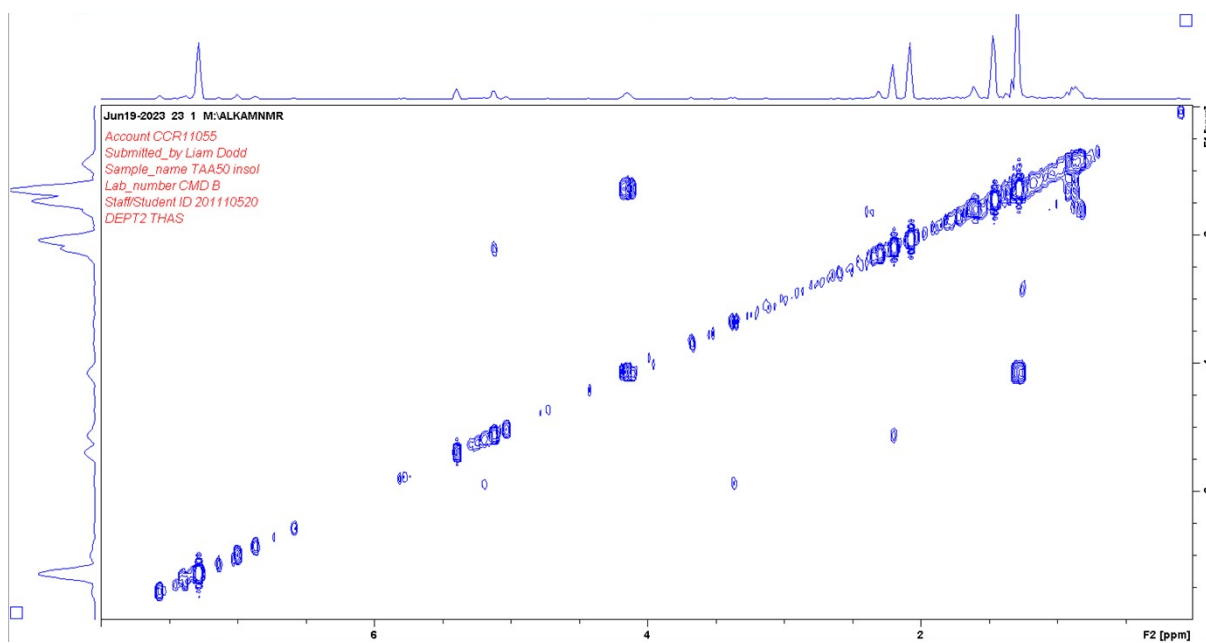

Figure S20: The  $^1\text{H}$   $^1\text{H}$  COSY NMR spectrum of the degradation products of TAA50-S50-Insol.

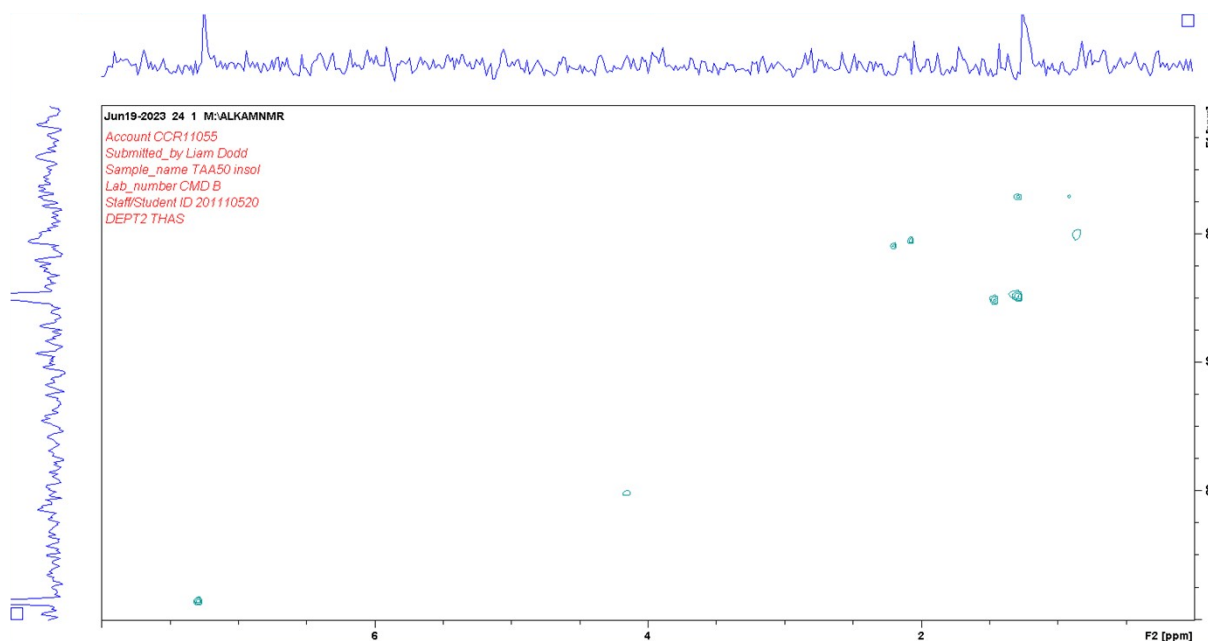

Figure S21: The  $^1\text{H}$   $^{13}\text{C}$  HSQC NMR spectrum of the degradation products of TAA50-S50-Insol.

Figure S19 shows that much like TPA50-S50-Sol, TAA50-S50-Insol shows some aromatic signals, many of them matching closely to those of TPA50-S50-Sol, with the exception of the broad peak at about 7.25 ppm that appears in the TPA50-S50-Sol spectrum, but not in the TAA50-S50-Insol spectrum, suggesting that TAA50-S50-Insol cannot form all the aromatic species that TPA50-S50-Sol can. Based on the assignments from the TPA50-S50-Sol spectrum, it may be that TAA50-S50-Sol cannot form benzenes or thiophenols but still can form thiophenes. The peaks that appear in Figure S15 between 4.75 ppm and 3.5 ppm do not appear in Figure S19 though it is hard to assign these peaks with any certainty. This does point to the fact that TAA50-S50-Insol may have fewer reaction pathways in its formation as compared to TPA50-S50-Sol. This might be expected since the alkyne functional group adds another pi bond in comparison to the alkene group, and TPA derived polymers could be expected to be more complex than TAA derived polymers. What else supports this conclusion is that for TAA50-S50-Insol, the lower chemical shift region of the spectrum is notably less dense with signals than the analogous region in the TPA50-S50-Sol region. That being said, several signals in this region directly match between the two polymers, namely those at 0.85 ppm, 1.25 ppm and 1.45 ppm. This suggests that there is a significant degree of similarity between the polymers which may imply that TPA can react via similar pathways to TAA, thus generating somewhat similar polymers. This may also imply that alkyne bonds can react in a similar way to alkene bonds, thus producing products that are similar; in other words, this may be evidence that alkynes do react as expected in inverse vulcanisation. Note that Figure S19 does show signals for ethyl acetate. Once again, the  $^{13}\text{C}$  NMR and DEPT135  $^{13}\text{C}$  NMR did not yield any signals through the noise for TAA50-S50-Insol, though the  $^1\text{H}$   $^{13}\text{C}$  HSQC did manage to produce a very weak  $^{13}\text{C}$  NMR spectrum, though the HSQC itself is not of particular utility in understanding the polymer structure.

Jun19-2023 30 1 M:ALKAMNMR  
Account CCR11055  
Submitted\_by Liam Dodd  
Sample\_name TAA50 sol  
Lab\_number CMD B  
Staff/Student ID 201110520  
DEPT2 THAS

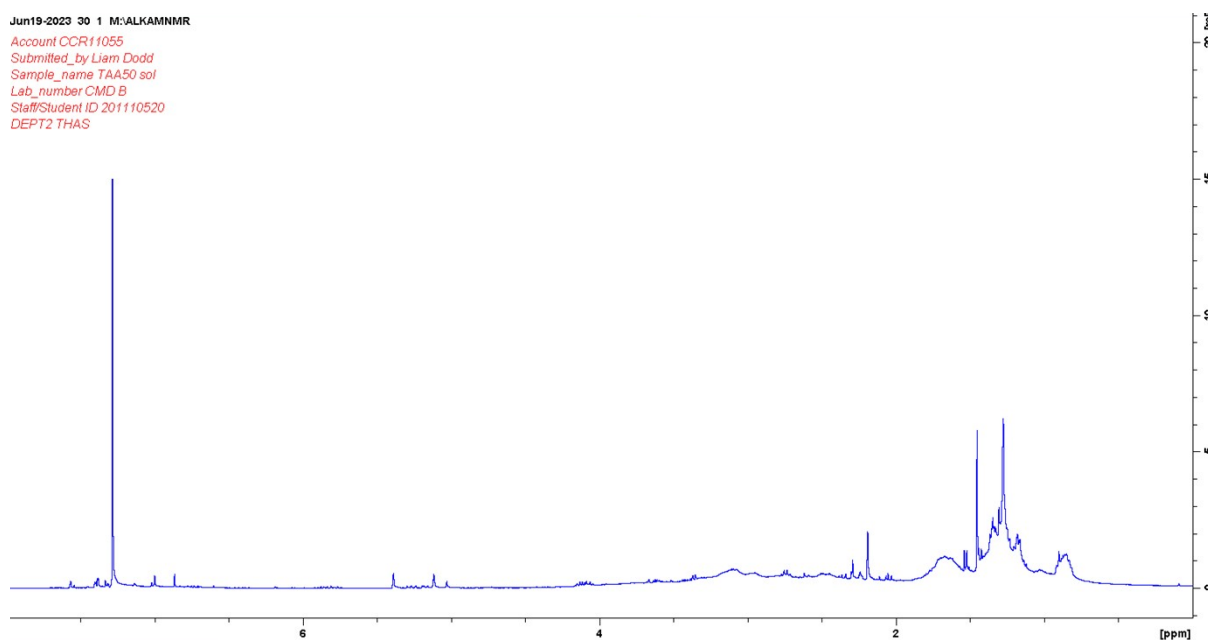

Figure S22: The  $^1\text{H}$  NMR spectrum of the degradation products of TAA50-S50-Sol.

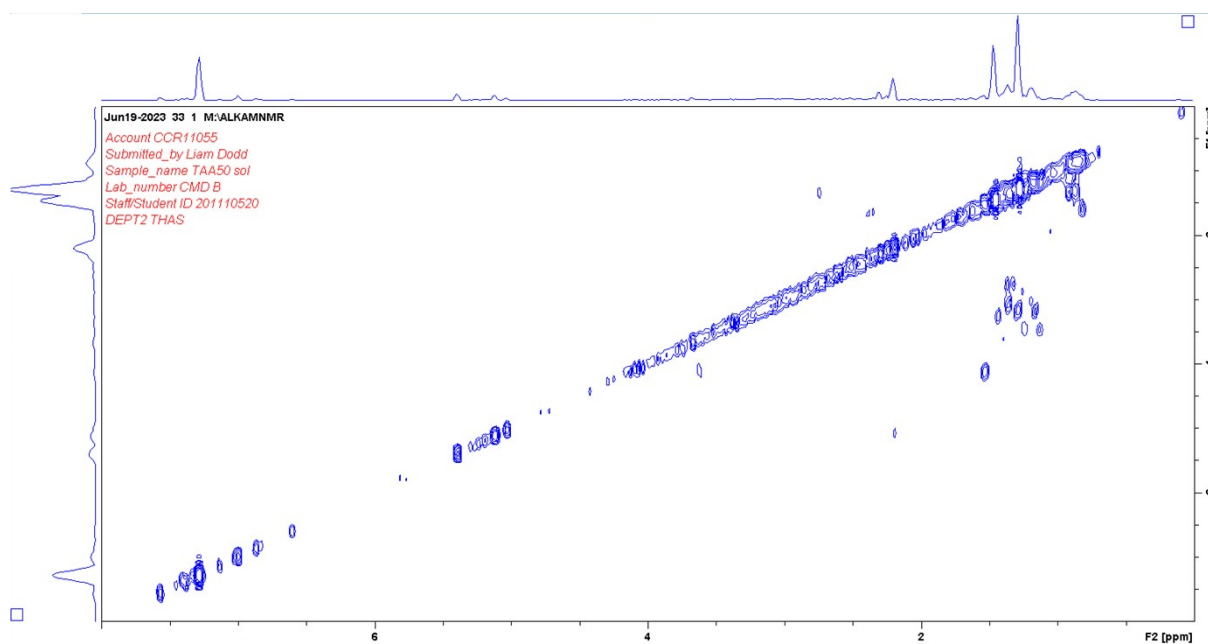

Figure S23: The  $^1\text{H}$   $^1\text{H}$  COSY NMR spectrum of the degradation products of TAA50-S50-Sol.

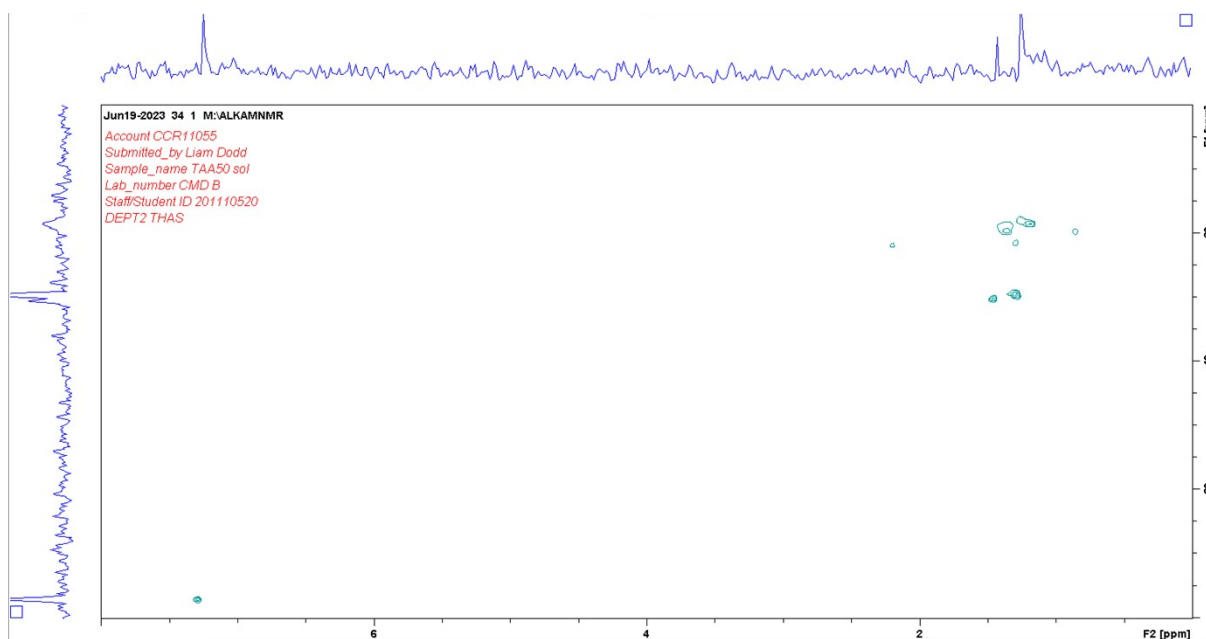

Figure S24: The  $^1\text{H}$   $^{13}\text{C}$  HSQC NMR spectrum of the degradation products of TAA50-S50-Sol.

Observing Figure S22, many of the same conclusions that were drawn from TPA50-S50-Sol and TAA50-S50-Insol can be made about TAA50-S50-Sol. One thing that is clear, is that the NMR spectra of TAA50-S50-Sol is more complex than the spectra of TAA50-S50-Insol. In addition to this, TAA50-S50-Sol shows some broad peaks in its spectra, which are absent in the spectrum of TAA50-S50-Insol, but have analogous peaks in the spectra of TPA50-S50-Sol. This implies that the Sol products have a tendency to display more broad peaks, which points toward the conclusion that the Sol products are less well defined than the Insol products, and have more by-product fragments in their structure. Once again, the  $^{13}\text{C}$  NMR and DEPT135  $^{13}\text{C}$  NMR did not yield any signals through the noise for TAA50-S50-Sol, though the  $^1\text{H}$   $^{13}\text{C}$  HSQC did manage to produce a very weak  $^{13}\text{C}$  NMR spectrum, though the HSQC itself is not of particular utility in understanding the polymer structure.

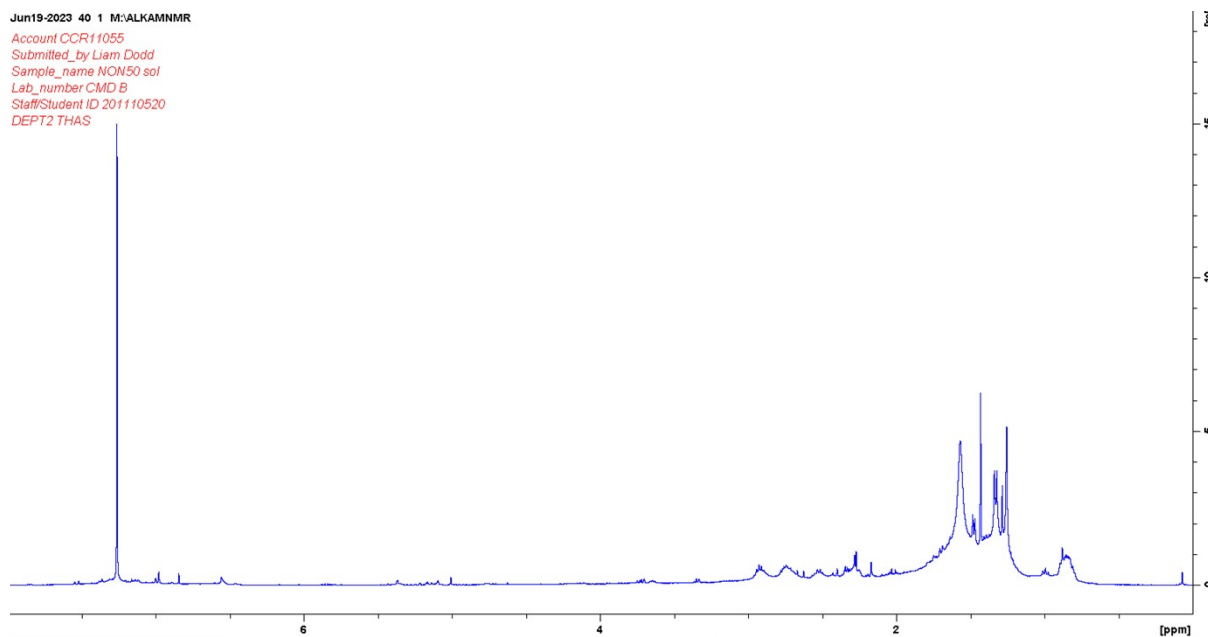

Figure S25: The  $^1\text{H}$  NMR spectrum of the degradation products of NON50-S50-Sol.

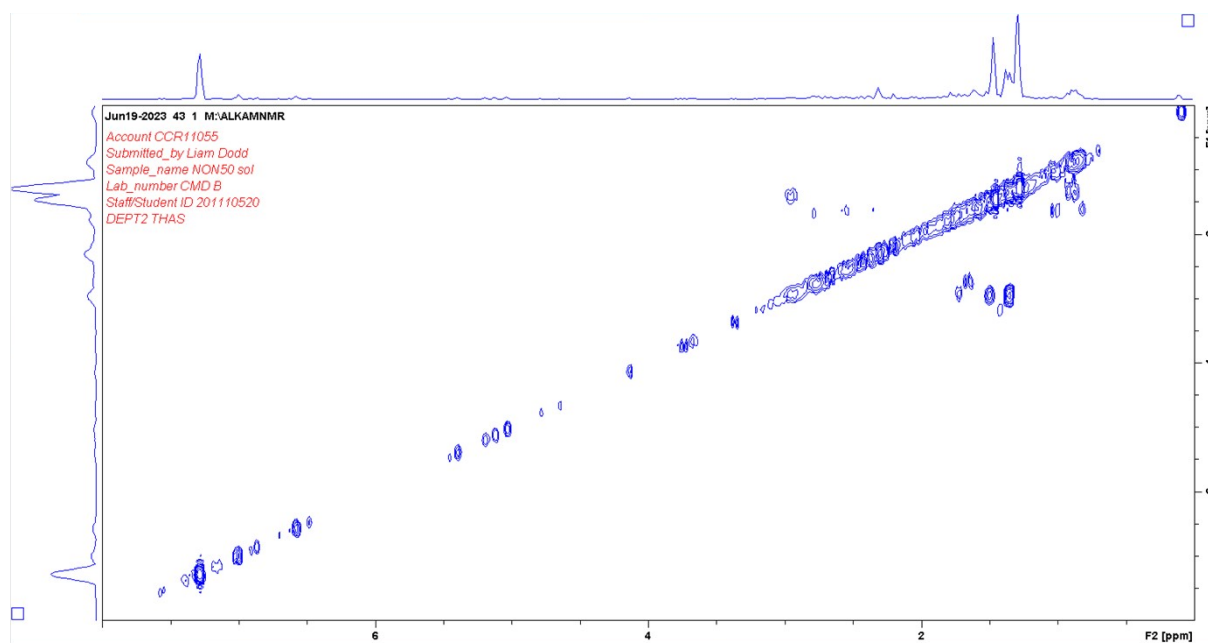

Figure S26: The  $^1\text{H}$   $^1\text{H}$  COSY NMR spectrum of the degradation products of NON50-S50-Sol.



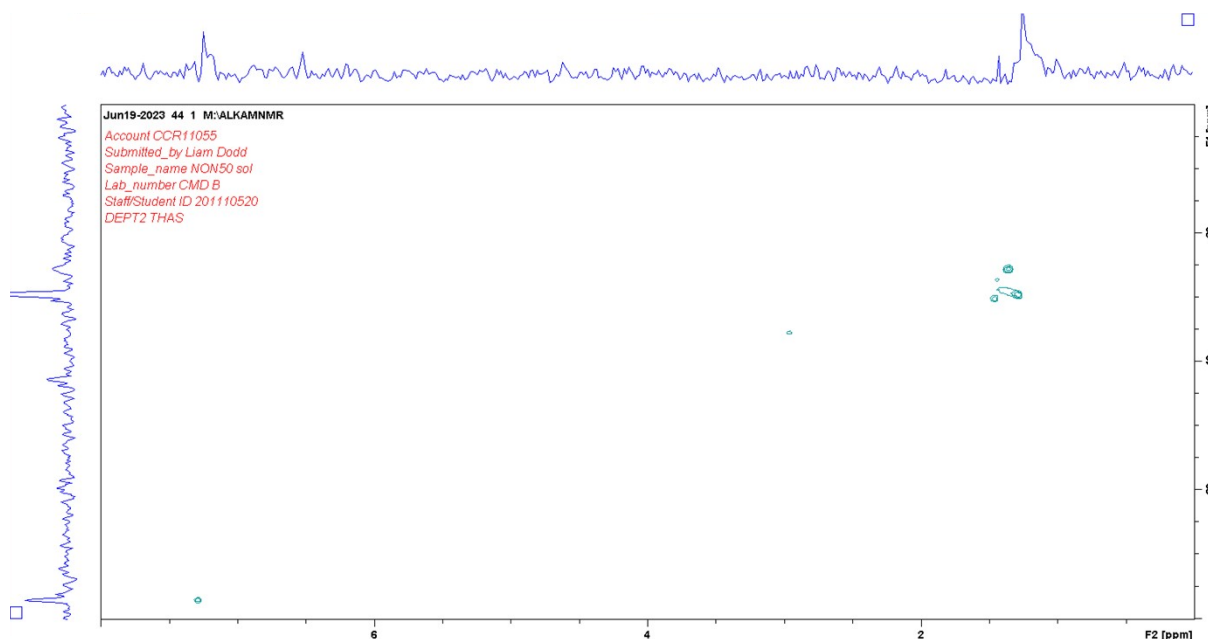

Figure S27: The  $^1\text{H}$   $^{13}\text{C}$  HSQC NMR spectrum of the degradation products of NON50-S50-Sol.

Figure S25 shows that the  $^1\text{H}$  NMR spectrum for NON50-S50-Sol is notably different to those of TAA or TPA polymers, likely due to the significant structural dissimilarity, and the higher predominance of aliphatic protons (NON has five  $\text{CH}_2$  groups, in three separate environments, whereas TAA and TPA have three  $\text{CH}_2$  groups, all in the same environment). What is interesting is that NON50-S50-Sol shows significantly weaker aromatic resonances than TAA or TPA, which suggests that the route to form these aromatic structures may rely on an amine activated reaction pathway, which NON does not have access to, and thus must use a kinetically slower route. NON50-S50-Sol also shows some alkene resonances, though they are comparatively weaker than those observed for TPA50-S50-Sol. These could be because that, as with TPA, NON's alkynes react progressively to an alkene and then to  $\text{sp}^3$  hybridised groups, but unlike TPA, because NON contains one fewer alkyne group, it a more complete reaction is observed due to there being proportionally less pi bonds for sulfur to react with in NON as compared to TPA. Much like the other Sol products, NON50-S50-Sol displays several broad peaks, reinforcing that the Sol products have a tendency to be less well defined than the Insols, and contain a wider variety of hydrogen environments. There are still some peaks present in Figure S25 that are analogous to those shown in the spectra of TPA and TAA polymers, for example the peak at 0.85 ppm which recurs in all the other  $^1\text{H}$  NMR spectra. This indicates that despite the structural differences between TPA, TAA, and NON, they are all forming related products, which implies they are all accessing relatively similar reaction pathways. Once again, the  $^{13}\text{C}$  NMR and DEPT135  $^{13}\text{C}$  NMR did not yield any signals through the noise for NON50-S50-Sol, though the  $^1\text{H}$   $^{13}\text{C}$  HSQC did manage to produce a very weak  $^{13}\text{C}$  NMR spectrum, though the HSQC itself is not of particular utility in understanding the polymer structure.

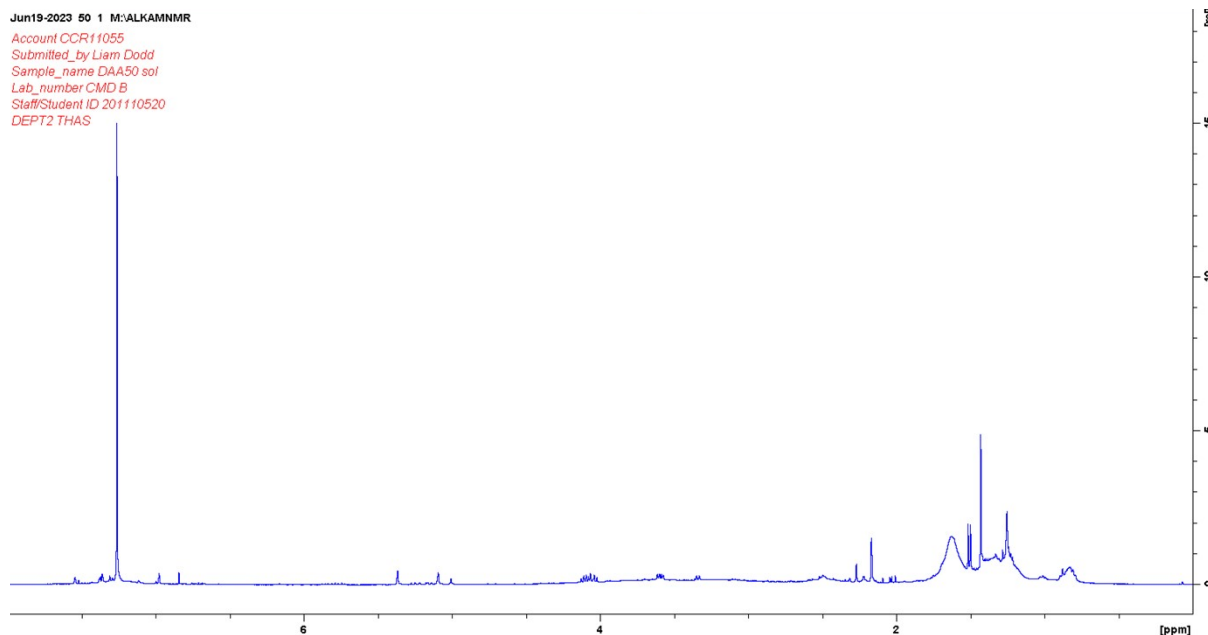

Figure S28: The  $^1\text{H}$  NMR spectrum of the degradation products of DAA50-S50-Sol.

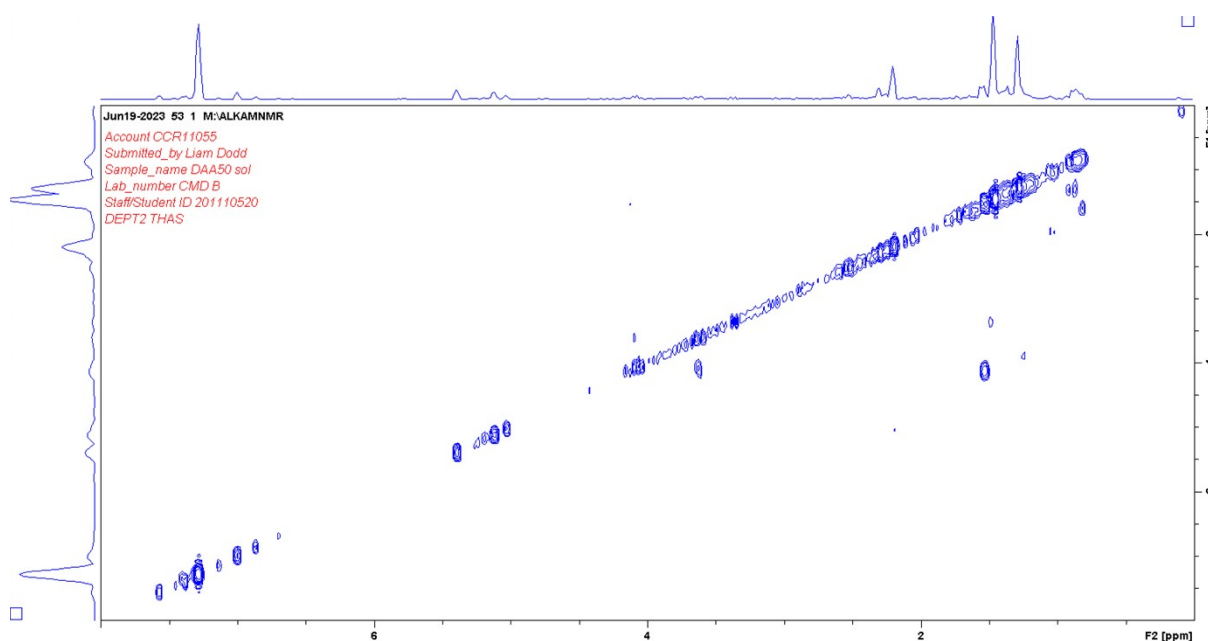

Figure S29: The  $^1\text{H}$   $^1\text{H}$  COSY NMR spectrum of the degradation products of DAA50-S50-Sol.

The NMR spectra for DAA50-S50-Sol largely reinforce the conclusions drawn from the other spectra. Again, there is evidence of incomplete consumption of alkene bonds, suggesting that the Sol products are less well reacted and less well crosslinked in comparison to the Insol products. These alkene peaks are however quite weak, suggesting that for the most part, the reaction was close to completion. DAA50-S50-Sol displays no evidence of benzenes or phenols, much like TAA50-S50-Sol and TAA50-S50-Insol, again suggesting that alkenes are less effective at forming the aromatics by-products. Again, the intensity for the aromatic resonances are quite weak in comparison to the predominant  $\text{sp}^3$  region of the spectrum. As a Sol product DAA50-S50-Sol shows more numerous broad peaks, reinforcing the

conclusion that the Sol products are less well defined. Nevertheless, DAA50-S50-Sol does show similarities in its spectra as compared to the other polymers, such as the 0.85 ppm peak, again reinforcing that these polymers are utilising similar reaction pathways to form similar products. The  $^{13}\text{C}$  NMR, DEPT135  $^{13}\text{C}$  NMR, and the  $^1\text{H}$   $^{13}\text{C}$  HSQC NMR did not yield any signals through the noise for DAA50-S50-Sol.

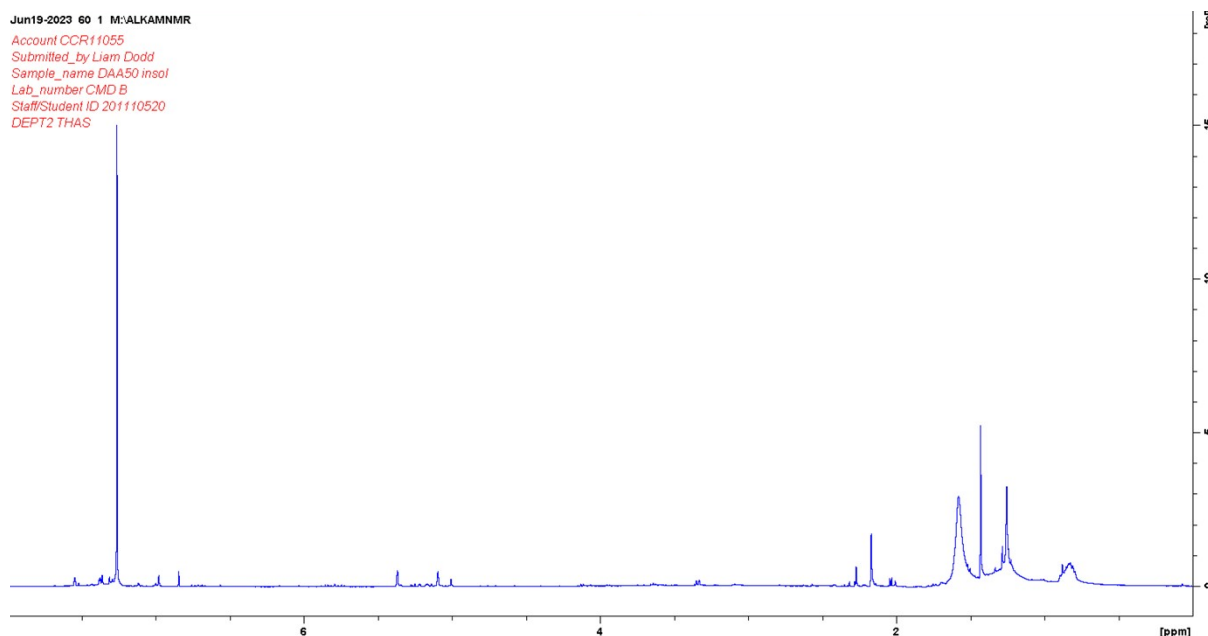

Figure S30: The  $^1\text{H}$  NMR spectrum of the degradation products of DAA50-S50-Insol.

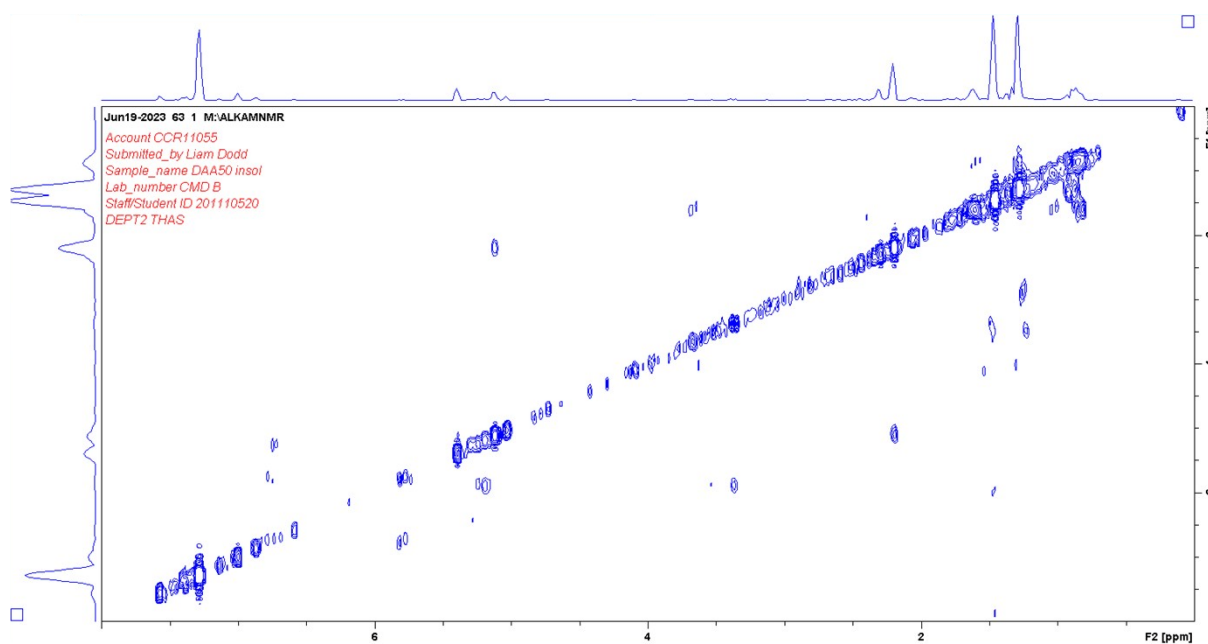

Figure S31: The  $^1\text{H}$   $^1\text{H}$  COSY NMR spectrum of the degradation products of DAA50-S50-Insol.

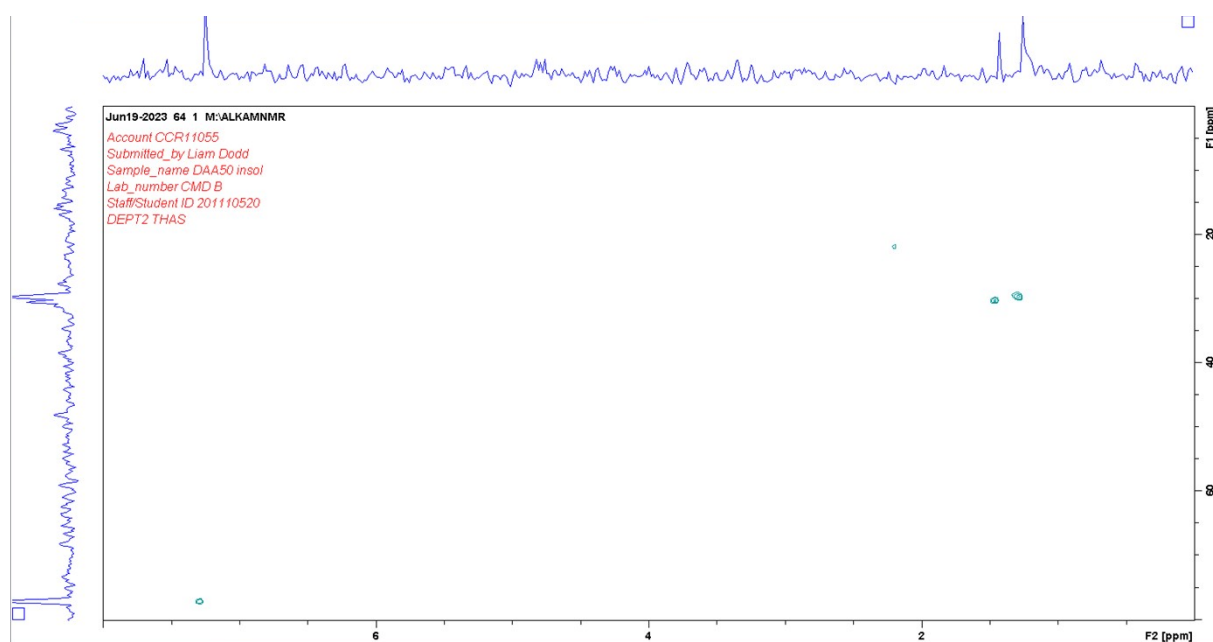

Figure S32: The  $^1\text{H}$   $^{13}\text{C}$  HSQC NMR spectrum of the degradation products of DAA50-S50-Insol.

The spectra of DAA50-S50-Insol only reinforce the previous conclusions and do not add anything of note. Once again, the  $^{13}\text{C}$  NMR and DEPT135  $^{13}\text{C}$  NMR did not yield any signals through the noise for DAA50-S50-Insol, though the  $^1\text{H}$   $^{13}\text{C}$  HSQC did manage to produce a very weak  $^{13}\text{C}$  NMR spectrum, though the HSQC itself is not of particular utility in understanding the polymer structure.

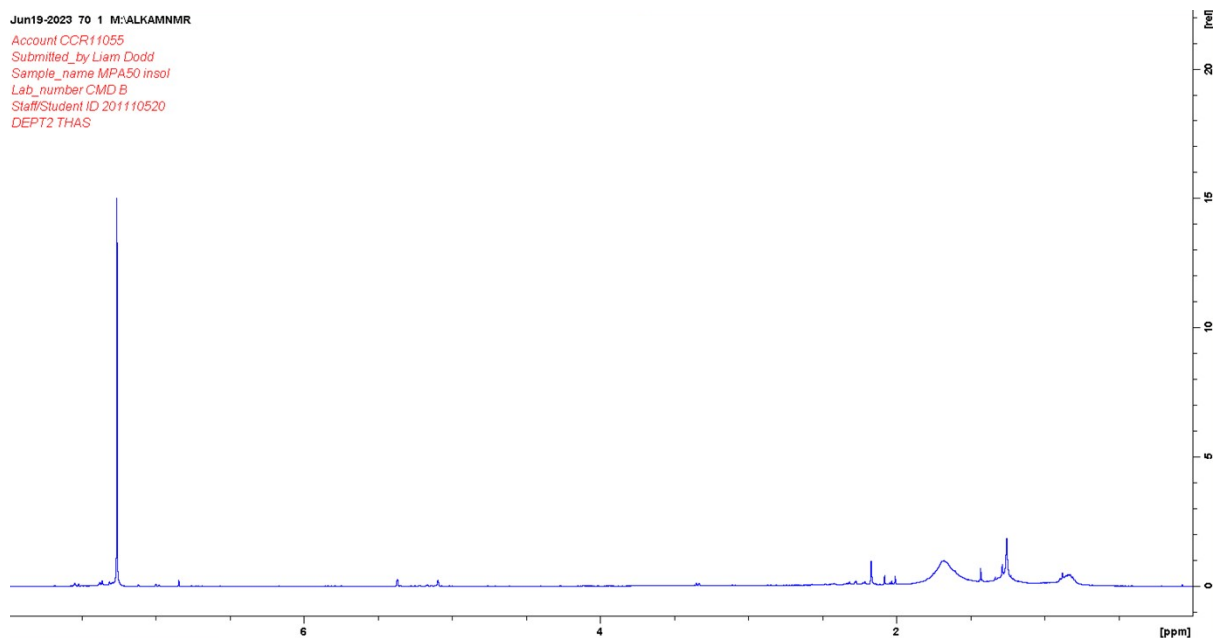

Figure S33: The  $^1\text{H}$  NMR spectrum of the degradation products of MPA50-S50-Insol.

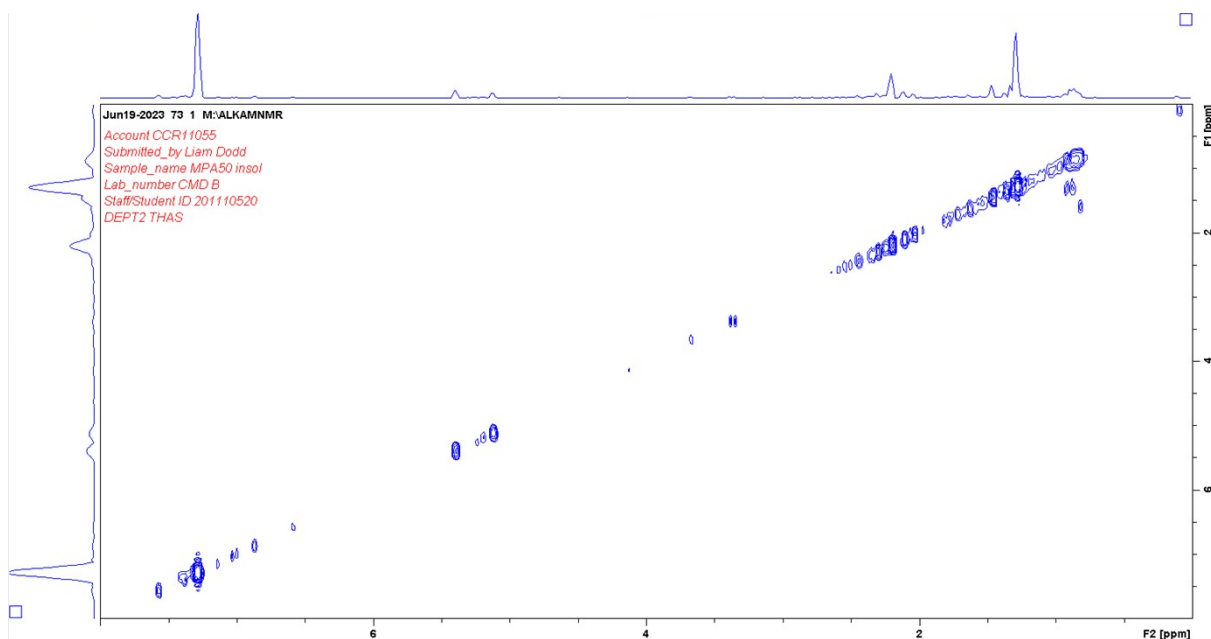

Figure S34: The  $^1\text{H}$   $^1\text{H}$  COSY NMR spectrum of the degradation products of MPA50-S50-Insol.

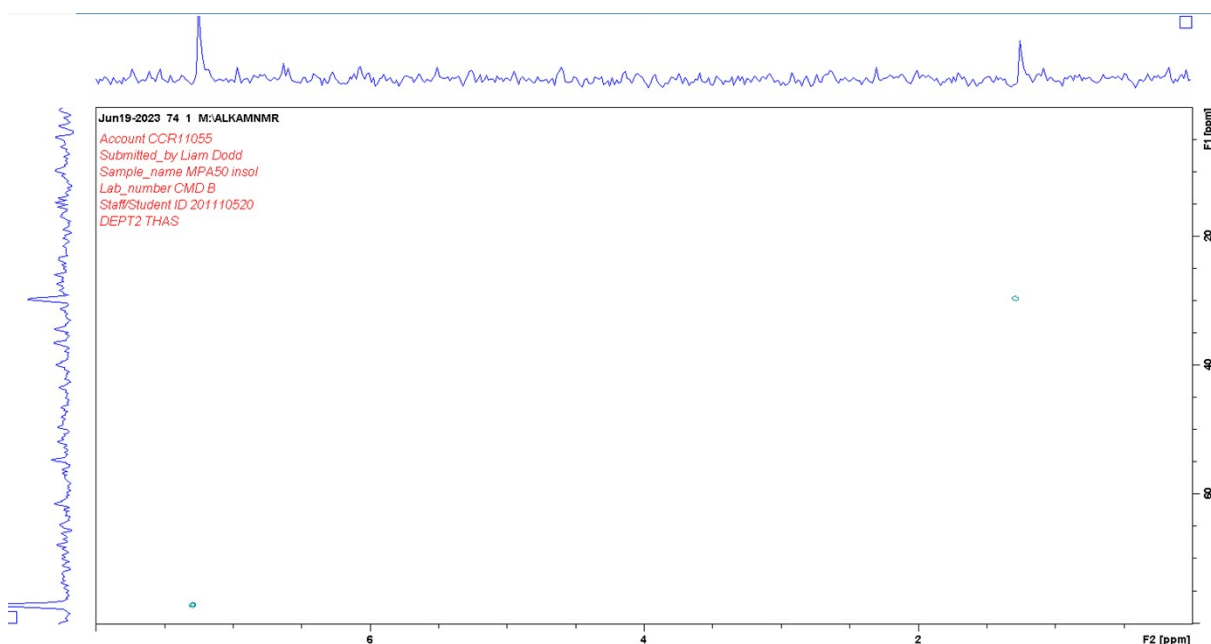

Figure S35: The  $^1\text{H}$   $^{13}\text{C}$  HSQC NMR spectrum of the degradation products of MPA50-S50-Insol.

The spectra of MPA50-S50-Insol do not add any new conclusions of note, and only reinforce the already established conclusions. The only significant difference between the spectra of MPA50-S50-Insol and the other polymer spectra is that the spectrum is comparatively simple, owing to MPA's simple structure. Once again, the  $^{13}\text{C}$  NMR and DEPT135  $^{13}\text{C}$  NMR did not yield any signals through the noise for MPA50-S50-Insol, though the  $^1\text{H}$   $^{13}\text{C}$  HSQC did manage to produce a very weak  $^{13}\text{C}$  NMR spectrum, though the HSQC itself is not of particular utility in understanding the polymer structure.

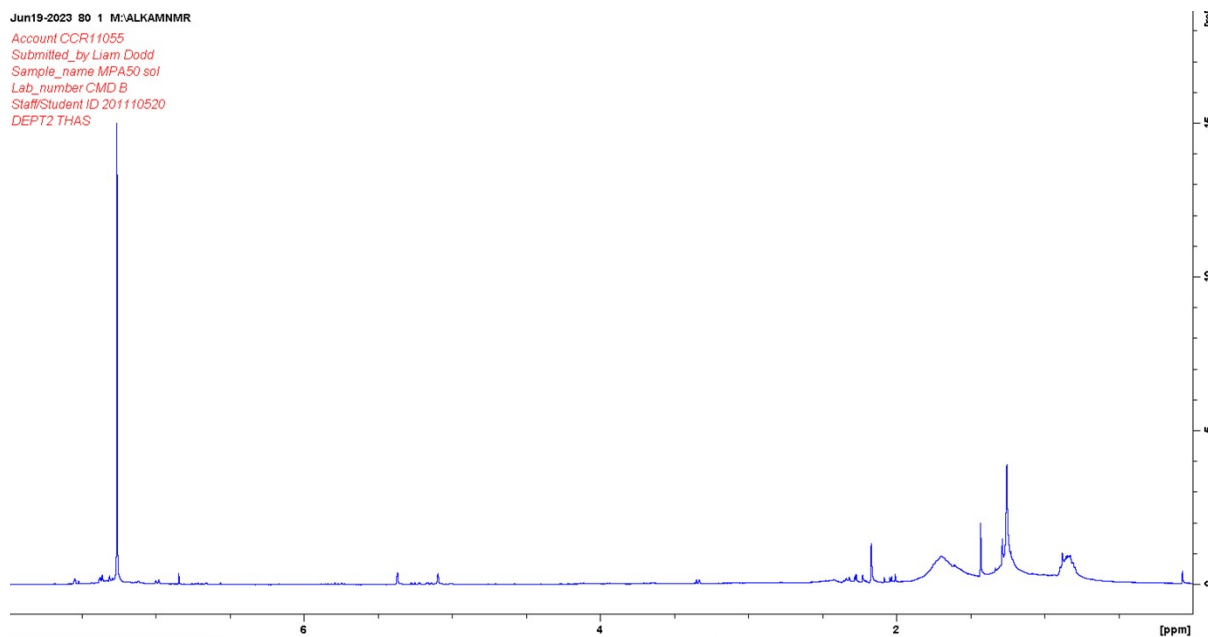

Figure S36: The  $^1\text{H}$  NMR spectrum of the degradation products of MPA50-S50-Sol.

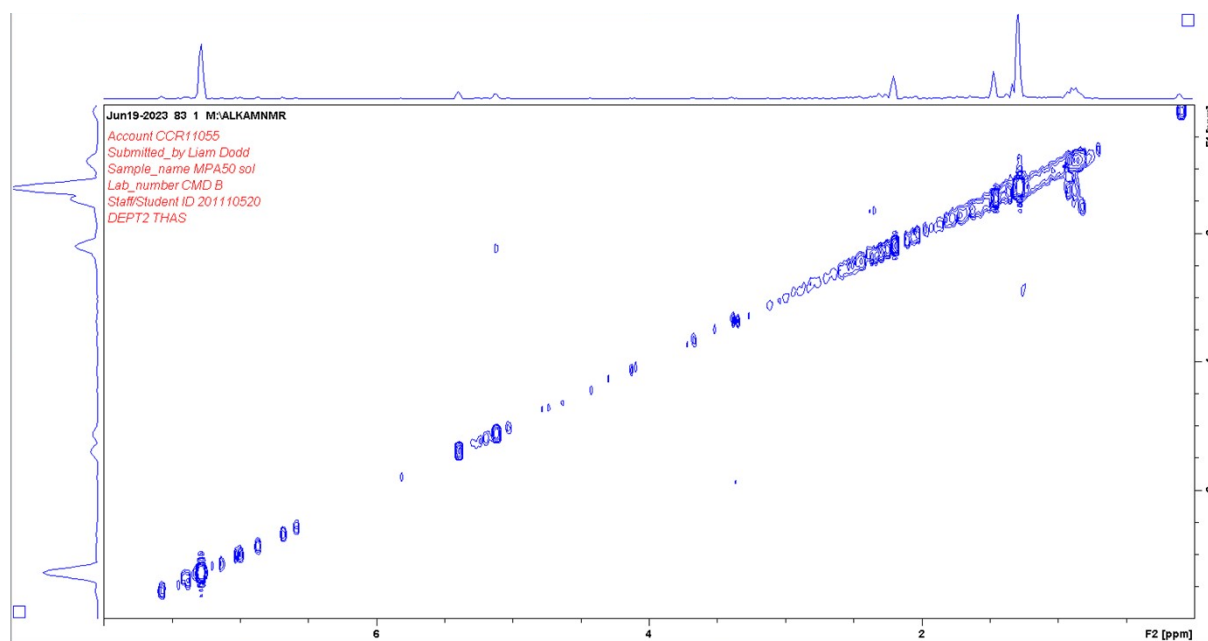

Figure S37: The  $^1\text{H}$   $^1\text{H}$  COSY NMR spectrum of the degradation products of MPA50-S50-Sol.

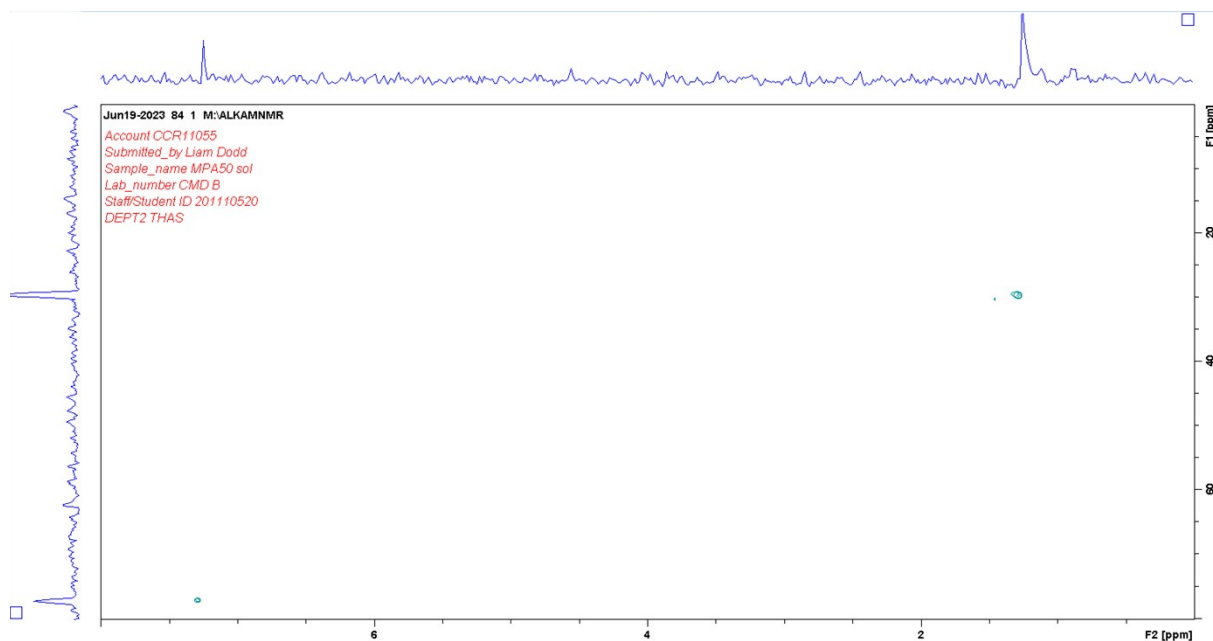

Figure S38: The  $^1\text{H}$   $^{13}\text{C}$  HSQC NMR spectrum of the degradation products of MPA50-S50-Sol.

The spectra of MPA50-S50-Sol do not add any new conclusions of note, and only reinforce the already established conclusions. The only significant difference between the spectra of MPA50-S50-Sol and the other polymer spectra is that the spectrum is comparatively simple, owing to MPA's simple structure. Once again, the  $^{13}\text{C}$  NMR and DEPT135  $^{13}\text{C}$  NMR did not yield any signals through the noise for MPA50-S50-Sol, though the  $^1\text{H}$   $^{13}\text{C}$  HSQC did manage to produce a very weak  $^{13}\text{C}$  NMR spectrum, though the HSQC itself is not of particular utility in understanding the polymer structure.

## X. Antimicrobial Activity Method

Glycerol stocks of *S. aureus* strain USA300 were stored at  $-80\text{ }^{\circ}\text{C}$  for long-term storage. For experimental use, frozen glycerol stocks of *S. aureus* were defrosted and spread onto LB agar plates which were then incubated overnight at  $37\text{ }^{\circ}\text{C}$ . Bacterial cultures were prepared by swabbing one colony into 10 mL of LB broth, followed by overnight incubation at  $37\text{ }^{\circ}\text{C}$ . Colony forming units (CFU) were enumerated by serially diluting the cultures in PBS onto LB agar, using the Miles and Misra method. CFU/cm<sup>2</sup> and CFU/mL were calculated using the following equation:

$$CFU = \frac{\text{Number of Colonies} \times \text{Dilution Factor}}{\text{Volume of Culture Plate}}$$

*S. aureus* USA300 was used to evaluate the antibacterial efficiency of the materials. Overnight cultured bacteria prepared in LB broth were diluted to 10<sup>5</sup> CFU/mL (OD<sub>600</sub> = 0.001) in LB medium. 5 mg of powdered sample was added to 5 ml of diluted culture. Diluted culture in the absence of sample was used as an untreated control. The samples were incubated for 5 h at  $37\text{ }^{\circ}\text{C}$  on a roller. Viable cells were enumerated after serial dilution of the solution in PBS onto LB agar, using the Miles and Misra method.



## XI. NMR Kinetics

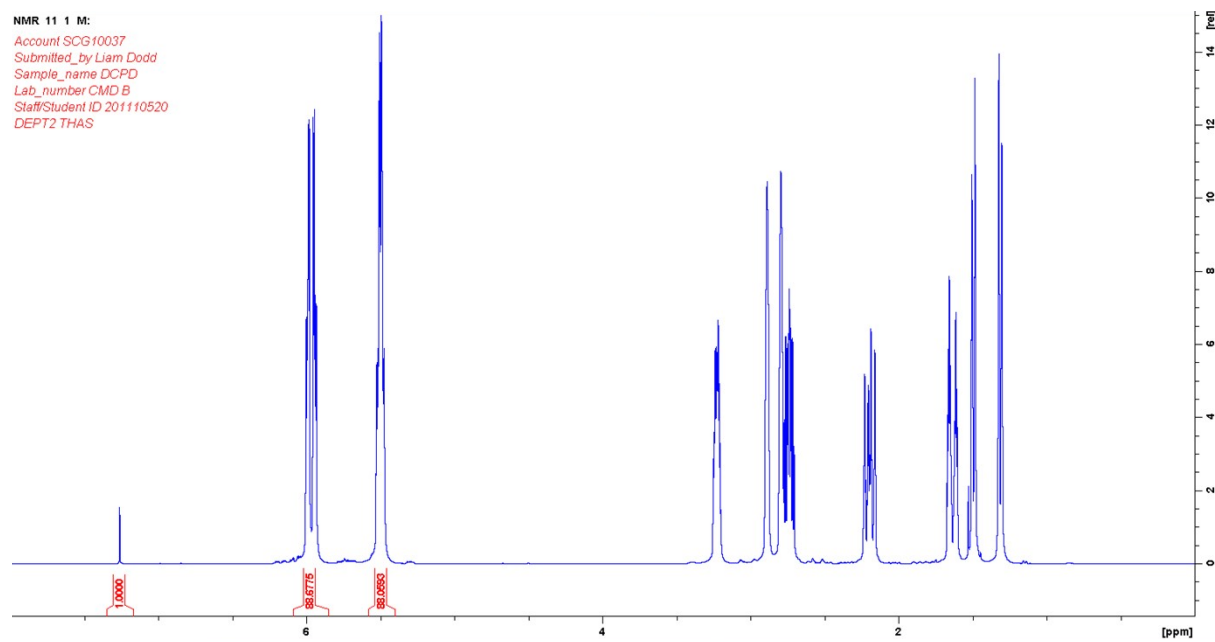

Figure S39: The  $^1\text{H}$  NMR spectrum of DCPD in  $\text{CDCl}_3$ .

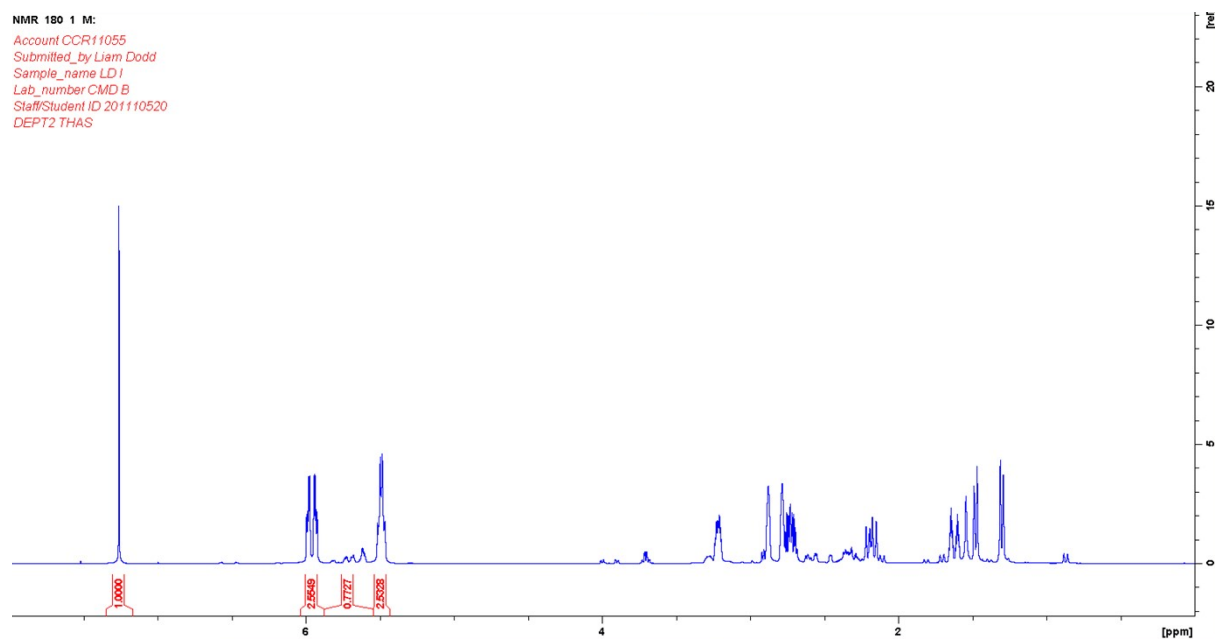

Figure S40: The  $^1\text{H}$  NMR spectrum of an aliquot of a DCPD inverse vulcanisation reaction mixture in  $\text{CDCl}_3$ , taken at 60 minutes reaction time.

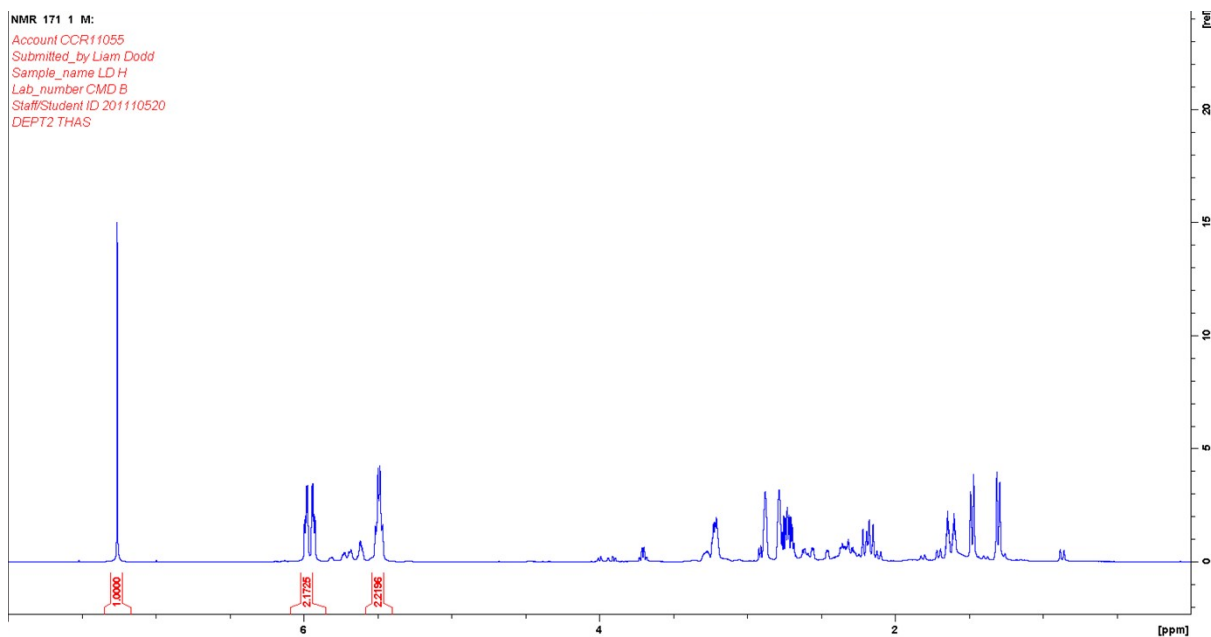

Figure S41: The  $^1\text{H}$  NMR spectrum of an aliquot of a DCPD inverse vulcanisation reaction mixture in  $\text{CDCl}_3$ , taken at 90 minutes reaction time.

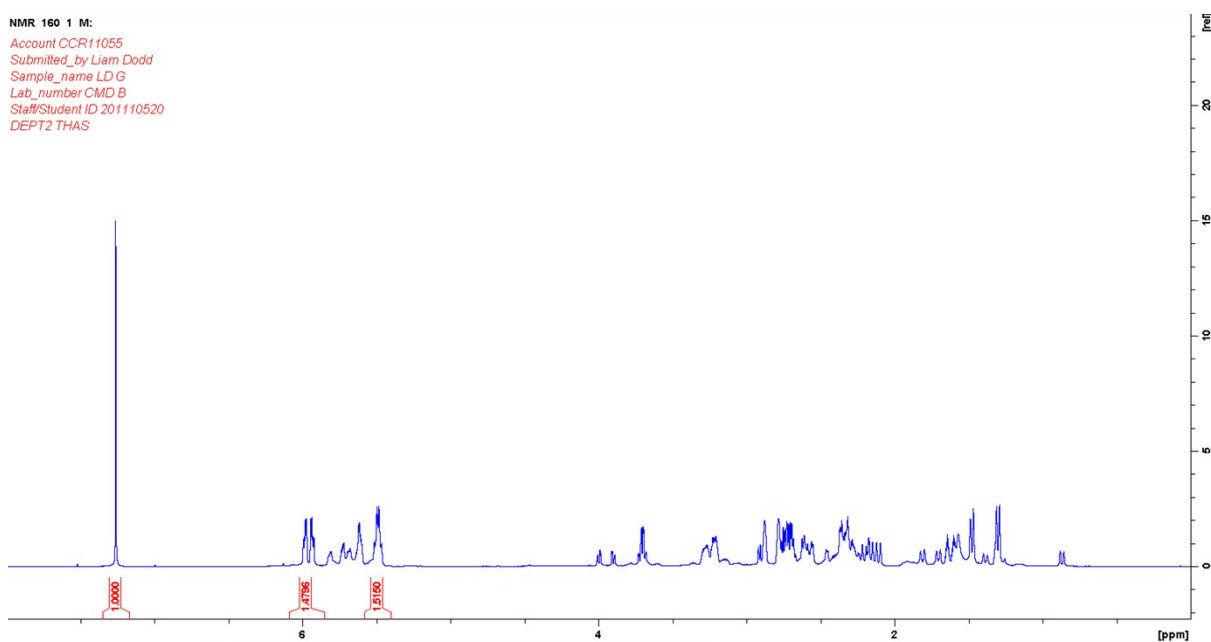

Figure S42: The  $^1\text{H}$  NMR spectrum of an aliquot of a DCPD inverse vulcanisation reaction mixture in  $\text{CDCl}_3$ , taken at 120 minutes reaction time.
